# Supplementary material for: Pre-monsoon air quality over Lumbini, a world heritage site along the Himalayan foothills
Source: Copernicus journal article supplement (doi:10.5194/acp-2016-430), 2016-06-17
Supplement: Supplementary file [file acp-2016-430-AC1-supplement.pdf]

February 10th, 2017

Dear Editor,

At first, we would like to thank you for serving as the editor for our work.

We would like to inform you that we have revised the manuscript significantly based on the comments by three reviewers. We believe that the comments have certainly helped improve the quality of our analysis and interpretations. We have shortened various sections, and also inserted new sections in order to incorporate reviewers' comments and hence strengthen our analysis and discussion. Sections on ratios of PM fractions, BC/CO ratios, and influence of meteorology on pollution concentrations have been inserted whereas section on model based aerosol composition has been taken out following the reviewer's suggestions. Moreover, new figures have also been included to explain the findings from our work. Finally, the abstract and conclusion section have been rewritten to reflect the updated findings.

Sincerely Yours,

Dipesh Rupakheti and Prof. Shichang Kang, on behalf of all coauthors

# **Pre-monsoon air quality over Lumbini, a world heritage site along the Himalayan foothills**

by D. Rupakheti et al., 2016 (ACPD)

We would like to thank the reviewers for their constructive comments and suggestions. Please find the [reviewer's comments in black and our replies in blue](#). The [changes in the revised manuscript are colored in red](#).

## **REVIEWER-1**

In this paper, authors present measured ambient PM, BC, CO and O<sub>3</sub> concentrations in Lumbini during an intensive measurement campaign from April-June 2013. They also conducted a regional WRF-STEM modeling to simulate the meteorology and air pollutant concentrations, as well as to examine the aerosol chemical composition. The authors conclude that there is high pollution in Lumbini and that a network of long-term air quality monitoring stations is needed in the greater Lumbini region. I agree with the authors that it is important to collect observational data in this area and the set of observations presented in the paper is extremely useful for understanding the magnitude of the air pollution problem and the potential sources. However, the language is very vague and the scientific discussion is limited. I find that the improvements are essential before the manuscript can be published in ACP. I list some of the concerns below.

We would like to thank the reviewer for considering the work we have conducted over Lumbini important. We have tried our best to incorporate reviewer's comments and suggestions in the following sections.

I am unsure if what we are most interested in is the comparison of Lumbini measurement with those of other cities. For example, they state that "BC observed at Lumbini was higher by a factor of ~6 and ~4.5 compared to that at Mt. Abu, India and near the base of the Mt. Everest, Nepal, respectively (1.323-326)" but how do we know what to make of these comparisons. What do we learn from these comparisons? To me, it is logical that Lumbini has higher BC

concentrations compared to those remote places. Similarly, I do not find interesting that the ozone concentrations were higher at Lumbini than in the Mt. Everest (l. 332). I would rather be more interested to know how the monthly concentrations change and when the highest and lowest concentration levels were and if there was any difference in the three months or over time among the species.

By comparing with other stations, we intend to show the status of air quality in Lumbini. We have rewritten the section in order to make it more scientific. Moreover, we calculated the monthly concentration change as suggested by the reviewer (see the [Figure S5](#)) and added a description in the text ([Section 3.2.1](#)). Changes are made in lines 378-400 (lines 394-400 for monthly variation) of the revised manuscript.

Regarding the ozone concentration at Lumbini, we have mentioned that the ozone at Lumbini was (l. 332) found to be lower than at the Mt. Everest region, and have provided the possible reasons for that phenomenon. Please see the [Section 3.2.2](#) in the revised manuscript.

Changes are made in lines 388-393 in the revised manuscript.

Also, examining the period when the model is able to reproduce observations and contrasting that to the times when the model fails would be a good way to make use of both measurements and the model. Such assessment should also provide a good basis for what needs to be improved in the model. I find the argument that the authors put forward on l. 261-262 that the “[D]iscrepancy on model results might have occurred due to various factors inherently uncertain in a weather model” to be hand-waving and not really helpful. With this data set, they should be able to understand the discrepancy between model and the observations a little better.

We thank the reviewer for this suggestion. As per the advice of other reviewers as well, we now have revised the manuscript to focus more on observation data. The model is used to explain only anthropogenic emission source regions (excluding open burning) using tagged CO tracers. Aerosol modeling studies will be a scope for future paper as model needs improvement (stated in [Section 3.2.2](#)).

The manuscript does describe when the model is able to perform well for CO concentration versus times when the predictions are poor (section 3.2.2 and section 3.3.1).

Why is PM1 concentration not discussed in the study (l. 282-283)? If it is discussed elsewhere, please mention it. If there was a problem with the data, then I think this should not be included in this manuscript at all. If there was no problem with the data, I think that can provide an additional insight into the measurements and is worth exploring more than just the average concentrations mentioned in l. 281.

There was no problem with the PM1 data as the instrument provided the concentration of PM10, PM2.5 and PM1 simultaneously. We have included the discussion on PM1 on the revised MS. Reviewer-2 also raised the similar concern. Please see the reply to Reviewer-2 as well on this matter. New additions are shown in lines 273-277, lines 285-296 of the revised manuscript.

I am quite confused about WRF-STEM model simulations. Authors state: “A comparison of model calculated average concentration along with the minimum and maximum concentrations of various pollutants (with observation) is shown in Table 3 (l.340-342).” However, right after this sentence, they write that “[T]he model based concentrations used here are instantaneous values for every third hour of the day (l. 342-343).” Can authors clarify which one that is and if the latter, why did they use the instantaneous values?

Thank you for pointing out this confusion. We mean to say that the model based concentrations were obtained at every third hour unlike the monitoring values. We also would like to make it clear that the modeling values reported in the whole manuscript is every third hour instantaneous value. This is corrected in the revised manuscript.

There are many places where authors state in a very qualitative manner, which obviously is not helpful for the reader to understand the issues being discussed. I list some of the sentences here:

We would, again, like to thank the reviewer for pointing this out. We have tried our best to explain and rephrase the sentences to make it scientific.

1. 1.298-299 “BC to CO ratio in Lumbini was found to be different from that observed at other urban and rural sites and those affected by forest fire/biomass burning.” What was the ratio observed at Lumbini and other places? What can we infer from this? What is the criterion for “different”?
2. 1. 299-302 “a suburban site, Pantnagar, in IGP also observed similar BC to CO ratio.” What value is considered “similar” and how is that determined? What do we learn from this?

Here we respond to comment #1 and #2 together. By the sentences as mentioned in l. 298-302, we intend to explain that the ratio of BC to CO observed at Lumbini were different from the ratio obtained over other sites (from literatures) except Pantnagar and Maldives. Reviewer-2 also raised the similar concern. Please see the reply to Reviewer-2 on this matter as well. Changes are shown in lines 324-339 of the revised manuscript.

3. 1. 318-321 “PM2.5 concentration in Lumbini have been found to be lower than the megacity like Delhi and north-western IGP regions due to higher level of emissions over those regions.” How did they come up with this conclusion? I do not see any comparison of emissions, especially at the sector level. Also, I understood that changing emissions in Lumbini and surrounding regions did not lead to a large concentration difference in the model when they conducted a sensitivity analysis (l. 474-488). Doesn’t this conflict with what is argued here?
4. 1. 321-323 “BC concentrations observed in Lumbini during pre-monsoon season was lower than the urban Asian cities like Kathmandu and Delhi, slightly higher than in Kanpur but high compared to the remote locations in the region.” Are the authors comparing the measurements during the same period between cities? What does “slightly higher” and “high” mean? What is the definition of these? More importantly, what do we learn from this?

Here we respond to comments #3 and #4 together. Unfortunately, we have not conducted any comparison on emission at sector level. We rather conducted comparison on concentrations. We compared the pre-monsoon seasonal average concentrations of BC, PM2.5, CO and O<sub>3</sub> obtained at Lumbini with other nearby sites (as mentioned in Table 2). The words like “slightly higher”

and “high” have been removed and the whole paragraph have been rephrased, as already provided in the response to the reviewer’s earlier question. Please see lines 382-389 for the changes in the revised manuscript.

5. 1. 355-359 “STEM model performance can be significantly improved via better constraining anthropogenic emissions inventory, emissions of open biomass burning and improvements in meteorological output from WRF amongst many other uncertainties inherent in regional chemical transport model.” How did they get to this conclusion?

Modeling scope for this current paper has been reduced as per reviewer advice and the associated sentences have been revised throughout the manuscript. However, for the above sentence, pollutant concentration is a function of meteorology (including transport), emissions, and physical and chemical transformation. Many of these processes are parameterized or not accounted in the model. Improvements in any one of these or all of these will lead to improvement in model skills.

6. 1. 526-529 “The curve during the prime cooking time is much close to the biomass curve of published data whereas that during non-cooking time is inclined towards the fossil fuel curve.” How is “much close” determined, as well as “inclined”?

We have rephrased this sentence in the revised manuscript with a new sentence and provided the comparison figure (Figure 14 in revised manuscript) with published data (to remove the confusion) on biomass and fossil fuel burning as below:

The curve obtained for the prime cooking time is closer towards the published curve on biomass burning whereas that obtained during the non-cooking time is closer towards the published fossil fuel curve.

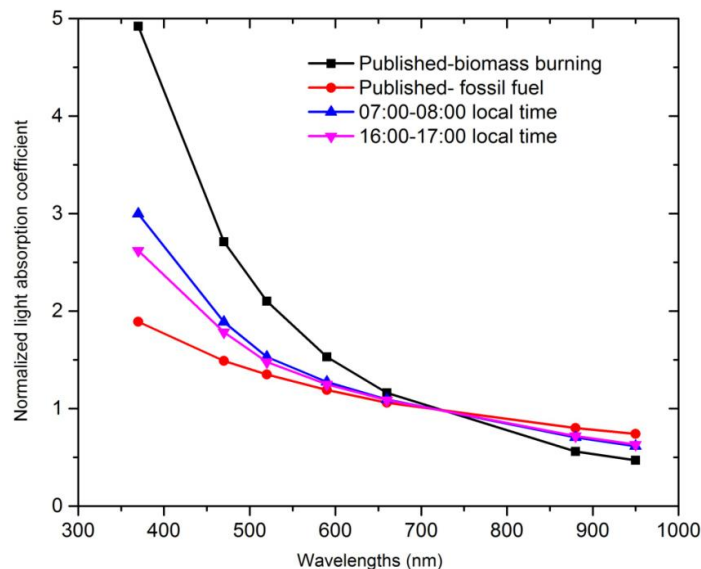

Figure 14: Comparison of normalized spectral light absorption coefficients obtained during the prime cooking (07:00-08:00 local time) and non cooking time (16:00-17:00 LT) at Lumbini with published data from Kirchstetter et al. (2004).

For the two events when authors found and elevated BC and CO concentrations, what were the PM and O<sub>3</sub> levels? Did they find an elevated PM on any other days? Did they find an elevated potassium levels during those days? I think that focusing on the analysis of these two events and clearly explaining the details of the regional contribution assessment presented in the manuscript would definitely strengthen the paper. The regional contribution assessment could be also extended by quantifying the monthly differences and also considering other species. This then could be linked to the chemical composition to assess if the regional contribution has anything to do with the chemical composition difference that they can potentially see in different months.

PM concentrations during two events were  $267.33 \pm 12.51$  (PM<sub>10</sub>),  $107.27 \pm 9.20$  (PM<sub>2.5</sub>) and  $76.75 \pm 7.67$  (PM<sub>1</sub>)  $\mu\text{g}/\text{m}^3$  during Event-I (i.e., 7-9<sup>th</sup> April, 2013) and  $297.60 \pm 75.48$  (PM<sub>10</sub>),  $117.90 \pm 34.85$  (PM<sub>2.5</sub>) and  $84.42 \pm 25.27$  (PM<sub>1</sub>)  $\mu\text{g}/\text{m}^3$  during Event-II (i.e., 3-4<sup>th</sup> May, 2013). Similarly O<sub>3</sub> concentrations were found to be  $53.47 (\pm 2.57)$  and  $56.75 (\pm 8.35)$  ppbv during Event-I and Event-II, respectively. The TSP sampling was conducted in coarse resolution (once in 3-6 days) due to which we unfortunately missed the sampling during the events days to evaluate the potassium level during the events.

The chemical composition analysis has been removed from the manuscript as suggested by other reviewers, and it also requires the work beyond the scope of this paper. However, we have added the monthly variation part (in Section 3.3.2) as suggested by the reviewer which reads as:

Regarding the monthly average contribution, the Ganges Valley and Nepal's contribution were almost equal during the month of April (~34% and ~37% respectively) but increased for the Ganges Valley region during the month of May (~44%) in which contribution of Nepal region got reduced (~25%) (Figure S6).

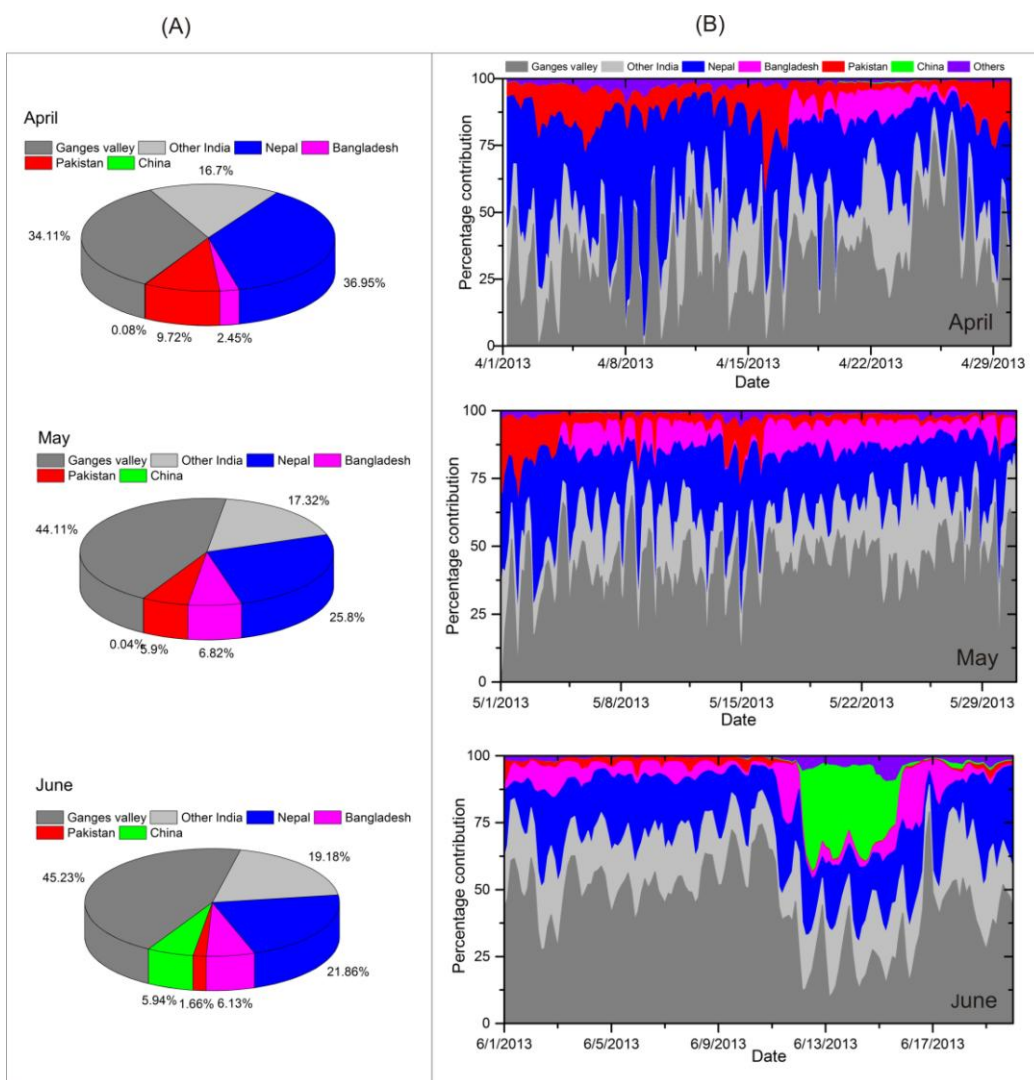

Figure S6: (A) Monthly average model estimated contributions of various source regions to average CO in Lumbini and (B) Time series of region tagged CO tracer during individual months.

Minor comments:

1. rain guage→ rain gauge (l. 239)

Corrected

2. I'm not sure if the authors really meant the way they wrote the sentence: "But, to our expectation, we could not observe any significant influence of forest fires within the specified grid (l. 419-420)." Did the authors really expect that they would not be able to observe influence? Or is this a typo?

We would like to thank the reviewer for pointing this out. At first, we were speculating the influence of the forest fires within the specified grid (local forest fire) for the occurrence of events in Lumbini. Later on, when we analyzed the forest fire over the larger region (as shown in Figure 9 and 10 in the ACPD MS), the influence of regional forest fire over our study site was confirmed.

3. Others region→ other regions (l. 469)

Corrected

## References

Kirchstetter, T. W., Novakov, T., and Hobbs, P. V.: Evidence that the spectral dependence of light absorption by aerosols is affected by organic carbon, J. Geophys. Res., 109, D21208, doi:10.1029/2004JD004999, 2004.

## **REVIEWER-2**

### *General comments*

The paper reports for the first time in Lumbini, Nepal, BC, CO, O<sub>3</sub> and PM data from a 3-month experiment in one site. The motivation is to understand air quality in Lumbini, but this objective sounds oversized in regard of the limited duration of the experiment. By the way, no scientific question is set and the methodology presents weak points. Data are new but rather few. No chemical speciation is provided to complete the data of species monitored online. Moreover, those online data could have been further treated: by using ratios (e.g., BC/CO, K/BC, PM<sub>1</sub>/PM<sub>2.5</sub>) and the aethalometer model to take full benefit from the BC spectral dependence. The use of modeling is useful to study the synoptic variability of pollutants, but appears highly questionable to simulate the chemical components, given the poor emission data used. A shorter manuscript, attempting to better understand for instance the source effects of the major emission points affecting Lumbini, using data only, not modeling could be considered.

We have tried our best to address the queries and suggestions raised by the reviewer. Scientific question has been provided in the revised manuscript. We feel sorry that we don't have the chemical speciation in this work which is beyond the scope of this paper. The revised manuscript includes substantial discussion using ratios to understand behavior and sources of pollutants. As the reviewer raise concern on the chemical components provided by the model, we have removed compositional analysis portion from the paper in the revised version.

### *Specific comments*

22 Abstract: Objectives and/or a specific question need to be clearly stated.

We have added the objective of our study in the abstract/introduction section.

The main objective of this work was to understand the level of air pollution, diurnal characteristics and the influence of open biomass burning on air quality in Lumbini.

178 Was any cut-off applied on the BC sampling line, or was it bulk BC?

No specific cut-off was applied on the BC sampling. Hence, the BC concentration reported in the manuscript is total suspended BC (lines 166-167 of the revised manuscript).

282 It is a pity that PM1 was not considered. The variations of the PM1-to-PM2.5 ratio would possibly provide interesting information about source profiles.

We did not discuss the PM1 concentration in the discussion version of the manuscript. It was not intentional. We have included PM1 now. Based on the suggestions from other reviewers (#1 and 3) as well, we have revised the General overview section (3.2.1) as **General overview, PM ratios and influence of meteorology on pollution concentrations** which now includes the ratios PM1-to-PM2.5, PM2.5-to-PM10, BC-to-PM1 and BC-to-PM2.5 and also the influence of meteorology on concentrations of monitored pollutants. Please see the Section 3.2.1 in the revised manuscript.

296 Both BC and CO are from incomplete combustion process but the ratio BC/CO is often specific to the different processes. A plot of the variations of BC/CO in time could be more relevant than BC and CO separately.

414 BC and CO originate from biomass burning as well as from any other fuel and combustion types, as mentioned earlier (line 296). Thus this sentence does not justify the use of BC and CO. Instead, BC/CO could help for source discrimination.

Agree. Regarding the Line 296 (Figure S2), a plot showing the time series of  $\Delta BC/\Delta CO$  during the monitoring period has been inserted. In addition, we have also compared the average  $\Delta BC/\Delta CO$  ratio observed at Lumbini with other sites (Figure 7) and have included in the main text. The discussions on the new figures have been inserted in the revised version of the manuscript (Section 3.2.1).

Moreover, as suggested by the reviewer, we have replaced the Figure 9 (of ACPD version) with the new figure (Figure 10) provided below where the ratio of  $\Delta BC/\Delta CO$  (daily average concentration) has been plotted instead of BC and CO separately.

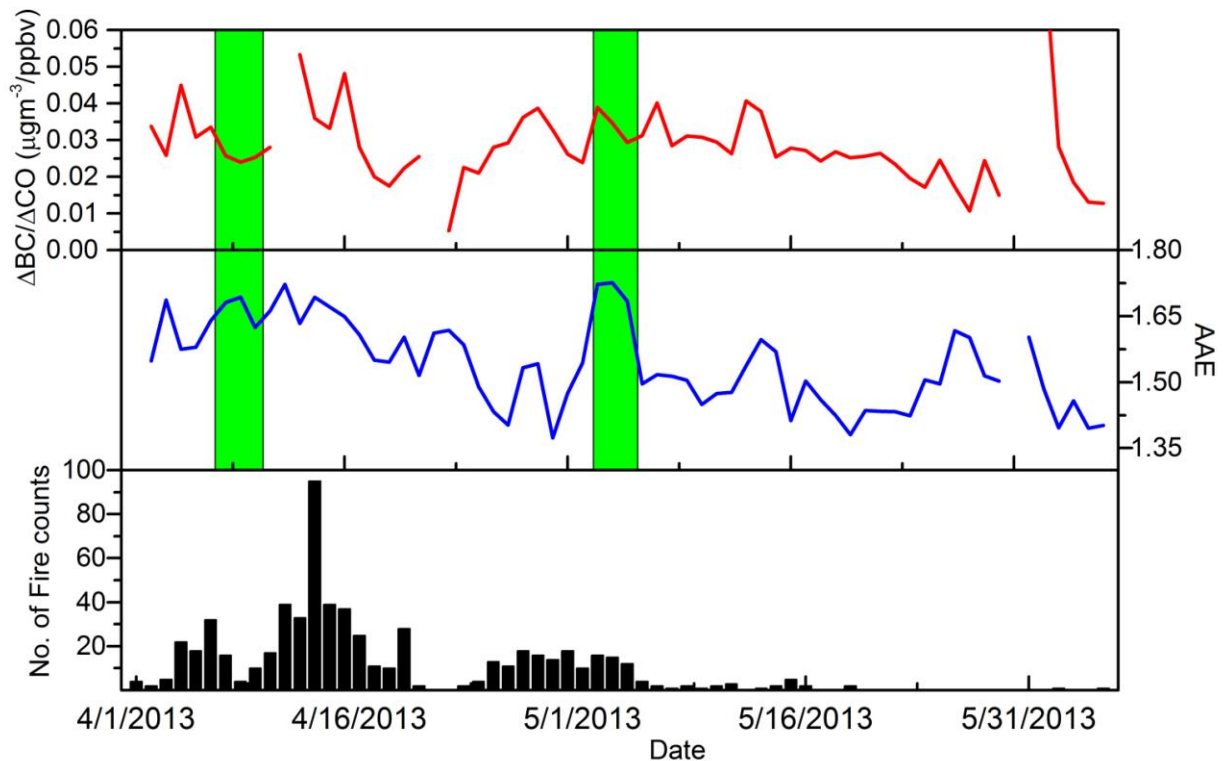

Figure 10. Time series of daily average  $\Delta\text{BC}/\Delta\text{CO}$  ratio and absorption Ångström exponent (AAE) derived from observations, along with fire counts acquired with the MODIS instrument onboard TERRA satellite for a 200×200 km grid centered at Lumbini. Two rectangular green boxes represent time of two episodes with high peaks in CO and BC concentrations as shown in earlier figures.

417 Potassium is a biomass burning tracer when the fine fraction is considered. As it can have other sources, it is rather examined as K/BC.

Agree. In the manuscript, we just want to state that the potassium concentration during the pre-monsoon season is higher in the whole year. In order to examine the K/BC ratio, we don't have (at least) a yearlong BC concentration from Lumbini. Recently, our group identified that the  $\text{K}^+$  in Lumbini is mostly from dust (Wan et al., 2016; manuscript under review for ACPD). So, we have rephrased the sentence in [Section 3.3.1](#) which reads as below:

The chemical composition of TSP filter samples collected at Lumbini also showed higher concentration of Levoglucosan, a biomass burning tracer in Lumbini during the pre-monsoon season as compared to other seasons of the year (Wan et al., 2016). Moreover, Wan et al. (2016) also reported that the highest correlation coefficient between  $K^+$  and tracers of dust ( $Ca^{2+}$  and  $Mg^{2+}$ ) indicating that dust is the main source of potassium in Lumbini.

#### Reference:

Wan, X., Kang, S., Li, Q., Rupakheti, D., Zhang, Q., Guo, J., Chen, P., Tripathi, L., Rupakheti, M., Panday, A.K., Wang, W., Kawamura, K., Gao, S., Wu, G. and Cong, Z.: Organic molecular tracers in the atmospheric aerosols from Lumbini, Nepal, in the northern Indo-Gangetic Plain: Influence of biomass burning, Manuscript under review for ACPD, 2016.

563 Remove PM1

We have discussed the PM1 in the revised MS. So, PM1 has not been removed.

#### Technical corrections

Has been done accordingly in the revised manuscript

86 “to be the most”

Done

150 “border”

Changed

182 “A similar value”

Done

211 latitudes and longitudes, why “s”

“s” removed

232 “viz.” what is the meaning?

“viz.” has been replaced with “like”

239 “gauge”

Changed

282 “24-hour”

Changed

369 “the emission inventory shows”

Changed

388 “15:00” remove “h”

Removed

487 “is not”

Changed

516 “these periods”

Changed

### **REVIEWER-3**

The authors made a good attempt to conduct the monitoring and modeling studies for the selected air pollutants over the study area. However, the current MS should be further improved before it can be reconsidered for the publication in ACP.

We would like to thank the reviewer for providing useful suggestions to refine our manuscript. Other two reviewers have also pointed out many issues to strengthen our work which we have dealt with in the revised version.

Major comments:

1) It is not clear what hypothesis the authors want to test in this study hence the content is quite diluted and is difficult to follow the MS.

Through this study we aim to understand and document the level of air pollution in Lumbini, located in the northern edge of the IPG before Himalayan foothills start to rise, during pre-monsoon (significantly polluted season in the Indo-Gangetic Plains), the diurnal characteristics of various air pollutants, and the influence of open biomass burning on the air quality in Lumbini region.

2) The linkage between the modeling and monitoring parts appear to be quite weak. How the results of both parts supported each other to reach the study objectives (and what are these)? If both monitoring and modeling results are to be incorporated then the purpose/research question should be clearly defined from the beginning.

Modeling work is used only to fill data gaps and understand source regions. We have reduced the scope of the modeling work as suggested by reviewers by removing the chemical compositional analysis. Models are evaluated with observations for improvement in emissions inventory and simulating meteorology parameters. Our analysis will aid in improving emissions work. These are highlighted in the manuscript.

The main objective of this work was to understand the level of air pollution, diurnal characteristics and the influence of open biomass burning on air quality in Lumbini.

In my opinion, it would be more interesting if the authors make better attempt to analyze the monitoring data (including also PM<sub>1</sub>, O<sub>3</sub> etc.) in relation to the sources and meteorology, etc. rather than to loosely cover all the activities/results as presented in this version.

We have tried our best to revise the manuscript by discussing more on the observed PM fractions, their ratios, and BC/PM ratio (please see the response to Reviewer-2). Moreover, a new paragraph on influence of meteorology on concentrations of air pollutants (see also Figure S3) has also been inserted. Please see the Section 3.2.1 **General overview, PM ratios and influence of meteorology on pollution concentrations** in the revised manuscript.

3) The methodology for the modeling part should be described in detail, especially the emission input data. The authors claimed in Line 436 that both modeling and monitoring results showed CO peaks during the biomass burning events but not indicated if and how the emissions from these 2 events were also included in the emission input data.

Section 2.3 does describe the emissions. Anthropogenic emissions are taken from HTAP v2 data while open burning is taken from data from FINN model. Both these emissions are widely used and references for these model/data are cited in the paper. Both emissions are re-gridded to the STEM model domain. Several STEM papers are cited that use this technique. Again due to reviewer's suggestion, the modeling scope of the paper has been reduced to identifying regional sources and filling in data gaps. Thus to go into further model component detail is not warranted.

Minor comments:

1) The description of monitoring instrument (2.2) is lengthy and could be moved to SI.

We have removed the (unwanted) description of monitoring instruments to make the section short and informative.

2) Too many qualitative statements in the MS.

We would like to thank the reviewer for pointing this out. Other reviewer also has pointed the same issue which we have already addressed earlier (please see the responses to the Reviewer-1).

# **Pre-monsoon air quality over Lumbini, a world heritage site along the Himalayan foothills**

Dipesh Rupakheti<sup>1,2\*</sup>, Bhupesh Adhikary<sup>3</sup>, Puppala S. Praveen<sup>3</sup>, Maheswar Rupakheti<sup>4,5</sup>,  
Shichang Kang<sup>6,7\*</sup>, Khadak S. Mahata<sup>4</sup>, Manish Naja<sup>8</sup>, Qianggong Zhang<sup>1,7</sup>, Arnico K. Panday<sup>3</sup>,  
Mark G. Lawrence<sup>4</sup>

<sup>1</sup>Key Laboratory of Tibetan Environment Changes and Land Surface Processes, Institute of  
Tibetan Plateau Research, Chinese Academy of Sciences, Beijing 100101, China

<sup>2</sup>University of Chinese Academy of Sciences, Beijing 100049, China

<sup>3</sup>International Centre for Integrated Mountain Development (ICIMOD), Kathmandu, Nepal

<sup>4</sup>Institute for Advanced Sustainability Studies (IASS), Potsdam 14467, Germany

<sup>5</sup>Himalayan Sustainability Institute (HIMSI), Kathmandu, Nepal

<sup>6</sup>State Key Laboratory of Cryospheric Science, Cold and Arid Regions Environmental and  
Engineering Research Institute (CAREERI), Lanzhou 730000, China

<sup>7</sup>Center for Excellence in Tibetan Plateau Earth Sciences, Chinese Academy of Sciences, Beijing  
100085, China

<sup>8</sup>Aryabhata Research Institute of Observational Sciences (ARIES), Nainital, India

*\*Correspondence to:*

D. Rupakheti ([dipesh.rupakheti@itpcas.ac.cn](mailto:dipesh.rupakheti@itpcas.ac.cn)), S.C. Kang ([shichang.kang@lzb.ac.cn](mailto:shichang.kang@lzb.ac.cn))

## Abstract

Lumbini, in southern Nepal, is a UNESCO world heritage site of universal value as the birthplace of Buddha. Poor air quality in Lumbini and surrounding regions is a great concern for public health as well as for preservation, protection and promotion of Buddhist heritage and culture. We present here results from measurements of ambient concentrations of key air pollutants (PM, BC, CO, O<sub>3</sub>) in Lumbini, first of its kind for Lumbini, conducted during an intensive measurement period of three months (April-June 2013) in the pre-monsoon season. The measurements were carried out as a part of the international air pollution measurement campaign; SusKat-ABC (Sustainable Atmosphere for the Kathmandu Valley - Atmospheric Brown Clouds). **The main objective of this work was to understand and document the level of air pollution, diurnal characteristics and the influence of open biomass burning on air quality in Lumbini.** ~~The ranges of hourly average concentrations were: PM<sub>10</sub>: 10.5–604.0 µg m<sup>-3</sup>; PM<sub>2.5</sub>: 6.1–272.2 µg m<sup>-3</sup>; BC: 0.3–30.0 µg m<sup>-3</sup>; CO: 125.0–1430.0 ppbv; and O<sub>3</sub>: 1.0–118.1 ppbv.~~ **The hourly average concentrations during the entire measurement campaign ranged as follows: BC: 0.3 - 30.0 µg m<sup>-3</sup>, PM<sub>1</sub>: 3.6-197.6 µg m<sup>-3</sup>, PM<sub>2.5</sub>: 6.1 - 272.2 µg m<sup>-3</sup>, PM<sub>10</sub>: 10.5 - 604.0 µg m<sup>-3</sup>, O<sub>3</sub>: 1.0 - 118.1 ppbv, and CO: 125.0 - 1430.0 ppbv.** These levels are comparable to other very heavily polluted sites ~~throughout~~ in South Asia. **Higher fraction of coarse mode PM was found as compared to other nearby sites in the IGP region. ΔBC/ΔCO ratio obtained in Lumbini indicated considerable contributions of emissions from both domestic and transportation sectors.** The 24-h average PM<sub>2.5</sub> and PM<sub>10</sub> concentrations exceeded the WHO guideline very frequently (94% and 85% of the sampled period, respectively), which implies significant health risks for the residents and visitors in the region. These air pollutants exhibited clear diurnal cycles with high values in the morning and evening. During the study period, the worst air pollution episodes were mainly due to agro-residue burning and regional forest fires combined with meteorological conditions conducive of pollution transport to Lumbini. Fossil fuel combustion also contributed significantly, accounting for more than half of the ambient BC concentration according to aerosol spectral light absorption coefficients obtained in Lumbini. WRF-STEM, a regional chemical transport model, was used to simulate the meteorology and the concentrations of pollutants to understand the pollutant transport pathways. The model was able to reproduce the temporal variation in the pollutant concentrations well; however, estimated values were 1.5 to 5 times lower than the observed concentrations for CO and PM<sub>10</sub> respectively. **Model simulated**

regionally tagged CO tracers showed **that** the majority of CO came from the upwind region of Ganges Valley. ~~The model was also used to examine the chemical composition of the aerosol mixture, indicating that organic carbon was the main constituent of fine mode PM<sub>2.5</sub>, followed by mineral dust.~~ **Model needs significant improvement in simulating aerosols in the region.** Given the high pollution level, there is a clear and urgent need for setting up a network of long-term air quality monitoring stations in the greater Lumbini region.

## 1. Introduction

The Indo-Gangetic plain (IGP) stretches over 2000 km encompassing a vast area of land in northern South Asia: the eastern parts of Pakistan, most of northern and eastern India, southern part of Nepal, and almost all of Bangladesh. The Himalayan mountains and their foothills stretch along the northern edge of IGP. The IGP region is among the most fertile and most intensely farmed region of the world. It is a heavily populated region with about 900 million residents or 12% of the world's population. Four megacities - Lahore, Delhi, Kolkata, and Dhaka are located in the IGP region, with dozens more cities with populations exceeding one million. The region has witnessed impressive economic growth in recent decades but unfortunately it has also become one of the most polluted, and an air pollution 'hot spot' of local, regional and global concern (Ramanathan et al., 2007). Main factors contributing to air pollution in the IGP and surrounding regions include emissions from vehicles, thermal power plants, industries, biomass and fossil fuel used in cooking and heating activities, agricultural activities, crop residue burning and forest fires. Air pollution gets transported long distances away from emission sources and across national borders. As a result, the IGP and adjacent regions get shrouded with a dramatic annual buildup of regional scale plumes of air pollutants, known as Atmospheric Brown Clouds (ABC), during the long and dry winter and pre-monsoon seasons each year (Ramanathan and Carmichael, 2008). Figure 1 shows the mean aerosol optical depth (AOD) acquired **from** the MODIS instrument onboard TERRA satellite over South Asia for a period of December 2012-June 2013. Very high aerosol **optical depth** along the entire stretch of IGP reflects severity of air pollution over large areas in the region.

Poor air quality continues to pose significant threat to human health in the region. In a new study of global burden of disease released recently, Forouzanfar et al. (2015) estimated that in 2013 around 1.7 million people died prematurely in Pakistan, India, Nepal, and Bangladesh as a result

of air pollution exposure, nearly 30% of global total premature deaths due to air pollution. Air pollution also affects precipitation (e.g. South Asian monsoon), agricultural productivity, ecosystems, tourism, climate, and broadly socio-economic and national development goals of the countries in the region (Burney and Ramanathan, 2014; Shindell, 2011; Ramanathan and Carmichael, 2008). It has also been linked to intensification of cold wave and winter fog in the IGP region over recent decades (Lawrence and Lelieveld, 2010 and references therein; Safai et al., 2009; Ganguly et al., 2006). Besides high levels of aerosol loading as shown in Fig. 1, Indo-Gangetic plains also have very high levels of ground level ozone or tropospheric ozone ( $O_3$ ) (e.g., Ramanathan and Carmichael (2008)). It is a toxic pollutant to plant and human health, and a major greenhouse gas (IPCC, 2013; Shindell, 2011; Mohnen et al., 1993). South Asia, in particular IGP region, has been projected to be the most ozone polluted region in world by 2030 (Stevenson et al., 2006). Majority of crop loss in different parts of the world results from effects of ozone on crop health and productivity (Shindell, 2011). Burney and Ramanathan (2014) also reported a significant loss in wheat and rice yields in India from 1980 to 2010 due to direct effects of black carbon (BC) and ozone ( $O_3$ ). BC and  $O_3$  are two key short-lived climate pollutants (SLCP). Because of the IGP's close proximity to the Himalaya-Tibetan plateau region, this once relatively clean region, is now subjected to increasing air pollution transported from regions such as the IGP, which can exert additional risks to sensitive ecosystems in the mountain region (e.g., (Lüthi et al., 2015; Marinoni et al., 2013; Duchi et al., 2011). Air pollution transport pathways to Himalayas are still not yet fully understood.

~~Air pollution can also damage the built environment and cultural and archeological heritages (Brimblecombe, 2003).~~ Monuments and buildings made with stones are vulnerable to air pollution damage (Brimblecombe, 2003; Gauri and Holdren, 1981). Sulfur dioxide, which forms sulfuric acid upon reaction with water is the most harmful substance for the monuments as it can corrode and damage them (Baedecker et al., 1992; Gauri and Holdren, 1981). Indo-Gangetic plains are rich in archeological, cultural and historical sites and monuments and many of them are inscribed as UNESCO World Heritage Site. For example, among many other such sites in IGP are the Archaeological Ruins at Moenjodaro (Pakistan), Taj Mahal in Agra and Mahabodhi Temple Complex in Bodh Gaya (India), Lumbini (Nepal), and ruins of the Buddhist Vihara at Paharpur (Bangladesh) (World Heritage List; UNESCO, website: <http://whc.unesco.org/en/list>). The Taj Mahal is one of the seven wonders of the modern world and India's greatest landmark.

~~Starting in 1970s, there have been observations of brownish/yellowish tone on its shiny white marble façade, and the primary suspect of discoloration was heavy air pollution from industries and traffic that grew around the monument site in Agra over the past decades. At the end of the last century, the government of India realized the growing problem~~ of air pollution damage to the Taj Mahal and started a program to save the monument. ~~It introduced measures to cut back pollution, as well as set up stations around the monument to monitor air quality around the clock.~~ A recent study has reported that deposition of light absorbing aerosol particles (black carbon, brown carbon) and dust is responsible for its discoloration (Bergin et al., 2015).

Lumbini, located near the northern edge of the central Ingo-Gangetic plain, is famous as the birthplace of the Lord Buddha. Lumbini is a UNESCO world heritage site of outstanding universal value to humanity, inscribed in the UNESCO list since 1997. The site, with valuable archaeological remains of the Buddhist *Viharas* (monasteries) and *Stupas* (memorial shrines), as well as modern temples and monasteries, is a center of attraction and visited by hundreds of thousands of pilgrims, scientists, scholars, yogis, and tourists every year. ~~Over recent years, there is increasing concern about poor air quality in Lumbini and the surrounding region.~~ There ~~was~~ is no regular air quality monitoring ~~surface monitoring of air quality in Lumbini at the time of our measurement campaign.~~

Through this study, we want to understand the level of air pollution, its diurnal characteristic, and the influence of open biomass burning on air quality in Lumbini. ~~As a first attempt to understand air quality in Lumbini,~~ We carried out continuous measurements of ambient concentrations of key air pollutants (particulate matter, black carbon, carbon monoxide, ozone) and meteorological parameters ~~other auxiliary measurements (Aerosol optical depth not discussed on the present study, meteorological parameters)~~ during an intensive measurement period of three months (April-June) in the year 2013. These are the first reported pollutant measurements for Lumbini. A regional chemical transport model called Sulfur Transport and dEposition Model (STEM) was used to simulate the variations of meteorological parameters and air pollutants during the observation period to understand pollution source region as well as the contribution of open biomass burning to air quality in Lumbini. Model simulated regionally tagged CO tracers were used to identify emission source regions impacting pollutant concentration observed at Lumbini. Satellite data has also been used to understand the high

pollution events during the monitoring period. These measurements were carried out as a part of the SusKat-ABC international air pollution measurement campaign (*M. Rupakheti, manuscript in preparation for ACPD*) jointly led by the International Centre for Integrated Mountain Development (ICIMOD), Kathmandu, Nepal and Institute for Advanced Sustainability Studies (IASS), Potsdam, Germany.

## 2. Experimental set up

### 2.1 Sampling site

The Lumbini measurement site (27°29.387' N, 83°16.745' E, elevation: ~100 m above sea level) is located at the premise of the Lumbini International Research Institute (LIRI), a Buddhist library in Lumbini. Lumbini lies in the Nepal's southern lowland plain or *Terai* region, termed as "bread basket of Nepal" due to the availability of very fertile land suitable for crop production, which forms the northern edge of the Indo-Gangetic Plains (IGP). 25 km north of Lumbini the foothills begin, while the main peaks of the Himalayas are 140 km to the north. The remaining three sides are surrounded by flat plain land of Nepal and India. The site is only about 8 km from the Nepal-India ~~border~~ **border** in the south. A three storied 10 m tall water tower was used as the platform for the automatic weather station (AWS) whereas remaining instruments were placed inside a room near the base of the tower. Figure 2 shows the location of Lumbini, the Kenzo Tange Master Plan area of the Lumbini development project, and the sampling tower. An uninterrupted power back up was set up in order to assure the regular power supply even during hours with scheduled power cuts during the monitoring period. The nearby premises of the monitoring site consist of the LIRI main office and staff quarters. Further away is a museum, a local bus park for the visitors to Lumbini, the office of the Lumbini Development Trust, monasteries, and thinly forested area with grassland within the master plan area. Outside of the master plan area lie vast area of agricultural fields, village pockets, and several brick kilns and cement industries. A local road (black topped), that cuts through the master plan area, lies about 200 m north of the sampling site and experiences intermittent passing of vehicles. According to the Ministry of Culture, Tourism and Civil Aviation of Nepal over 130 thousand tourists (excluding Nepalese and Indian citizens) visited the Lumbini area in 2014 (<http://tourism.gov.np/en>).

## 2.2 Monitoring Instruments

The summary of instruments deployed in Lumbini is presented in Table 1. ~~They monitored ambient concentrations of various air pollutants and local meteorological parameters continuously during the sampling period of about two and half months.~~ All data were collected in Nepal Standard Time (NST) which is GMT +05:45 hour. PM<sub>1</sub>, PM<sub>2.5</sub> and PM<sub>10</sub> mass concentrations were monitored continuously with GRIMM EDM164 (GRIMM Aerosol Technik, Germany), ~~reporting data every 5 min. The instrument~~ **which** uses the light scattering at 655 nm to derive mass concentrations. ~~More description on the technical aspects of the instrument can be found on the manufacturer's website (<http://wiki.grimm-aerosol.de/index.php?title=ENVIRO-EDM164>).~~ The EDM164 used in this study was a newly purchased instrument which was calibrated at the factory of the GRIMM Aerosol Technik in Germany before it was deployed at Lumbini. Similarly, aerosol light absorptions at 7 wavelengths (370, 470, 520, 590, 660, 880, 950 nm) were measured continuously with an Aethalometer (Model AE-42, Magee Scientific, USA), averaging and reporting data every 5 min. ~~AE-42~~ **It** was operated at a flow rate of 5 l min<sup>-1</sup>. **No cut-off was applied for inlet; hence the reported concentration of BC is total suspended BC particles.** As described by the manufacturer, ambient BC concentration is derived from light absorption at 880 nm using a specific mass absorption cross section. To obtain BC concentration in Lumbini, we used a specific mass absorption cross-section value of 8 m<sup>2</sup> g<sup>-1</sup> for the 880 nm channel. **A** similar value has been previously used for BC measurement in the Indo-Gangetic plain (Praveen et al., 2012). ~~Optical measurement by filter-based absorption photometers, such as the Aethalometer, suffer from measurement artifact known as filter loading effect which must be taken into account and corrected for while deriving ambient BC concentrations.~~ **To remove the filter loading effect, we** used correction method suggested by Schmid et al. (2006) which was also used by Praveen et al. (2012) for BC measurements at a rural site in the Indo-Gangetic plain. Surface ozone (O<sub>3</sub>) concentration was measured continuously with an ozone analyzer (Model 49i, Thermo Scientific, USA), ~~reporting data every minute. It~~ **which** utilizes UV (254 nm wavelength) photometric technology to measure ozone concentration in ambient air. CO analyzer (Model 48i, Thermo Scientific, USA) was used to monitor ambient CO concentration, ~~recording data every minute. The CO analyzer~~ **which** is based on the principle that CO absorbs infrared radiation at the wavelength of 4.6 microns. The ambient air was drawn through 6-micron pore size SAVILLEX 47 mm filter at the inlet in order to remove the dust particles before sending air

into the CO and O<sub>3</sub> analyzers using a Teflon tube. The filters were replaced every 7-10 days depending on particle loading, based on manual inspection. ~~Both CO and O<sub>3</sub> analyzers were new instruments, freshly calibrated at the factory before deploying them in Lumbini.~~ The CO instrument was set to auto-zero at a regular interval of 6 hours. Local meteorological parameters (temperature, relative humidity, wind speed, wind direction, precipitation, and global solar radiation) were monitored with an automatic weather station (AWS) (Campbell Scientific, Loughborough, UK), recording data every minute.

### 2.3 Regional chemical transport model

Aerosol and trace gas distributions were simulated using a regional chemical transport model. Sulfur Transport and dEposition Model (STEM), a 3D eulerian model, that has been used extensively in the past to characterize air pollutants in South Asian region was used to interpret observations at Lumbini (Kulkarni et al., 2015; Adhikary et al., 2007). The Weather Research and Forecasting (WRF) model (Skamarock et al., 2008) version 3.5.1 was used to generate the required meteorological variables necessary for simulating pollutant transport in STEM. The model domain was centered at 24.94° N latitude and 82.55° E longitude covering a region from 3.390° N to 43.308° N ~~latitudes~~ **latitude** and 34.880° E to 130.223° E ~~longitudes~~ **longitude**. The model has 425×200 horizontal grid cells with grid resolution of 25×25 km and 41 vertical layers with top of the model set at 50 mbar. The WRF model was run from November 1, 2012 to June 30, 2013. However, for this study, modeled data only from April to June 2013 have been used. The WRF model was initialized with FNL data available from NCAR/UCAR site (<http://rda.ucar.edu/datasets/ds083.2/>).

The tracer version of the STEM model provides mass concentration of sulfate, BC (hydrophilic and hydrophobic), Organic carbon (OC), sea salt (fine and coarse mode), dust (fine PM<sub>2.5</sub> and PM<sub>10</sub>), CO (biomass and anthropogenic) and region tagged CO tracers. STEM model domain size, resolution and projection are those of the WRF model. Details about tracer version of the STEM model is outlined elsewhere (Kulkarni et al., 2015; Adhikary et al., 2007). Anthropogenic emission of various pollutants (CH<sub>4</sub>, CO, SO<sub>2</sub>, NO<sub>x</sub>, NMVOC, NH<sub>3</sub>, PM<sub>10</sub>, PM<sub>2.5</sub>, BC and OC) used in this analysis were taken from the EDGAR-HTAP\_v2 ([http://edgar.jrc.ec.europa.eu/htap\\_v2/index.php?SECURE=123](http://edgar.jrc.ec.europa.eu/htap_v2/index.php?SECURE=123)). ~~Emission inventory were developed for the year 2010 gridded at the spatial resolution of 0.1°×0.1°.~~ Open biomass burning

emissions on a daily basis during the simulated period were taken from data obtained from the FINN model (Wiedinmyer et al., 2011). Both these emissions were re-gridded to the STEM model domain. As with the WRF model, the STEM model was run from November 2, 2012 to June 30, 2013 however, data presented here are only during the intensive field campaign period.

### 3. Results and discussions

#### 3.1 Meteorology

##### ~~3.1.1 Time series of local meteorological parameters~~

Hourly average time series of various meteorological parameters viz. like precipitation in mm hr<sup>-1</sup> (Prec), temperature in °C (T), relative humidity in % (RH), temperature in °C (T), wind speed in m s<sup>-1</sup> (WS) and direction in degree (WD) and wind speed in m s<sup>-1</sup> (WS) during the monitoring period are shown in Figure 3. Meteorological parameters were obtained with the sensors at the height of ~12 m from the ground. Moreover, Meteorology results from simulations using a 3D WRF model have been used to compare with the observations, and to fill the data gaps. Precipitation data was derived from TRMM satellite (TRMM\_3B42\_007 at a horizontal resolution of 0.25°) from the Giovanni platform (<http://giovanni.gsfc.nasa.gov/giovanni/>) as the rain gauge rain gauge malfunctioned during the sampling period. Precipitation data from TRMM (Figure 3) show that Lumbini was relatively dry in the early portion of the measurement campaign while as the pre-monsoon edged closer to the monsoon onset, the site did experience some rainfall events. This lowered aerosol loading in the later half of the measurement campaign due to washout. Comparison of WRF model outputs with TRMM data shows that the model under-predicts rainfall through out the campaign.

Average observed temperature for the sampling period until the sensor stopped working (on 8<sup>th</sup> May, 2013, i.e., for 38 days of measurement) was 28.1°C (minimum: 16.5°C, maximum: 40°C). Average temperature from the model, during same period, was 31°C with values ranging between 19 - 40°C. As shown in Figure 3, the model captures the synoptic variability of temperature and is mostly within the range of daily values. However, the model has a high bias and does not capture well daily minimum temperature values. The model does not show any large variation in temperature for the period after the sensors stopped working. This insight will be useful to interpret pollution data later on.

For the same period (until the sensor stopped working), the average (observed) RH was ~ 50% (ranging from 10.5 to 97.5%) whereas the model showed the average RH to be ~ 23% with values ranging between 6 to 78%. RH values are highly underestimated by the model however; the synoptic scale variability is captured by the model.

Average observed wind speed during the study period was  $2.4 \text{ m s}^{-1}$ , with hourly values ranging between  $0.03 - 7.4 \text{ m s}^{-1}$  whereas from the WRF model average wind speed was found to be  $3.2 \text{ m s}^{-1}$  (range:  $0.06 - 11.1 \text{ m s}^{-1}$ ). ~~Comparison of the model output data with observation shows that the model adequately captures wind speed to study pollutant transport.~~ Diurnal variation of observed hourly average wind speed suggested that wind speeds were lower during nights and mornings while higher wind speed prevailed during day time, with average winds  $> 3 \text{ m s}^{-1}$  up to  $\sim 3.3 \text{ m s}^{-1}$  between 09:00-13:00 local time (Supplementary materials, Figure S1, ~~upper~~ lower panel). High speed strong winds ( $> 4 \text{ m s}^{-1}$ ) were from the NW direction during the month of April which later switched to almost opposite direction, i.e., SE direction from the month of May onwards. Figure 4 shows the monthly wind rose plot (using WRPLOT view from the Lakes Environmental, <http://weblakes.com/>). Comparing modeled wind direction prediction skills at the surface with one point measurement is not sufficient. However, in the absence of other measurements, we also show the comparison of wind direction. Since there are no glaringly large biases in the observed surface wind direction, and the lack of measured upper wind data even from nearby region, we use the model to interpret pollutant transport to Lumbini. ~~Average observed temperature for the sampling period until the sensor stopped working (on 8<sup>th</sup> May, 2013, i.e., for 38 days) was  $28.1^{\circ}\text{C}$ , with a minimum value recorded to be  $16.5^{\circ}\text{C}$  whereas the maximum was  $40^{\circ}\text{C}$ . Average T from the model, during same period, was  $31^{\circ}\text{C}$  with values ranging between  $19 - 40^{\circ}\text{C}$ . The model captures the synoptic variability of temperature and is mostly within the range of daily values. However, the model has a high bias and does not capture daily minimum temperature values. For the same period (until the sensor stopped working), the average (observed) RH was ~ 50% (ranging from 10.5 to 97.5%) whereas the model showed the average RH to be ~ 23% (same period as observation) with values ranging between 6 to 78%. RH values are highly underestimated by the model however; the synoptic scale variability is captured by the model.~~ Discrepancy on model results might have occurred due to various factors inherently uncertain in a weather model. However, we believe that

modeled data is vital for understanding pollutant transport in an area where observation data are non-existent or are incomplete.

### ~~3.1.2~~ Synoptic scale winds during pre-monsoon

The monthly mean synoptic wind for the month of April, May and June is presented in Figure 5. NCEP/NCAR reanalysis monthly data of winds at 1000 mbar were used to study the wind pattern. The red dot in the figure indicates the location of Lumbini. NCEP/NCAR data showed the dominance of calm winds over the measurement site. Similar type of wind directions were observed over Kanpur, India, also in the IGP, during the pre-monsoon season (Srivastava et al., 2011).

## 3.2 Time-series of air pollutants **Air Quality**

### 3.2.1 General overview, **PM ratios and influence of meteorology on pollution concentrations**

~~Figure 6 shows hourly averaged time series of both observed and modeled PM<sub>10</sub>, PM<sub>2.5</sub>, BC, CO and O<sub>3</sub> observed at Lumbini during the study period. In this section, results have been discussed based upon the observation datasets only. Section 3.2.3 will discuss model comparison and interpretation.~~

~~*Both PM fractions:* PM<sub>10</sub> and PM<sub>2.5</sub> showed similar temporal behavior. Observed hourly average PM<sub>10</sub> concentrations ranged between 10.5–603.9  $\mu\text{g m}^{-3}$  with an average of  $128.9 \pm 91.9 \mu\text{g m}^{-3}$  whereas PM<sub>2.5</sub> concentrations ranged between 6.1 and 272.2  $\mu\text{g m}^{-3}$  with an average of  $53.1 \pm 35.1 \mu\text{g m}^{-3}$  during the sampling period. In addition to this, average PM<sub>1</sub> concentration was  $35.8 \pm 25.6 \mu\text{g m}^{-3}$  with the concentrations ranging between 3.6 to 197.6  $\mu\text{g m}^{-3}$ . PM<sub>1</sub> concentration has not been discussed in this study. The observed 24 hour average particulate matter concentrations (PM<sub>2.5</sub> and PM<sub>10</sub>) were found frequently higher than the WHO prescribed guidelines for PM<sub>2.5</sub> (25  $\mu\text{g m}^{-3}$ ) and PM<sub>10</sub> (50  $\mu\text{g m}^{-3}$ ), (WHO, 2006) — PM<sub>2.5</sub>: 94% and PM<sub>10</sub>: 85% of the measurement period of 53 days. Similarly, BC concentrations during the measurement period ranged between 0.3–29.9  $\mu\text{g m}^{-3}$  with a mean ( $\pm$ SD) value of 4.9 ( $\pm$ 3.8)  $\mu\text{g m}^{-3}$ . The lowest concentration was observed during a rainy day (21–22 April) whereas the highest concentration was observed during a period of forest fire (detailed in Section 3.4). BC concentrations in~~

Lumbini during pre-monsoon months are lower compared to BC concentrations observed in the Kathmandu Valley because of high number of vehicles plying on the street, brick kilns and other industries in Kathmandu valley (Putero et al., 2015a; Sharma et al., 2012).

Figure 6 shows hourly averaged time series of observed BC, PM<sub>1</sub>, PM<sub>2.5</sub>, PM<sub>10</sub>, CO and O<sub>3</sub> observed at Lumbini during the study period. Similar temporal behaviour was shown by BC, particulate matter fractions (PM<sub>1</sub>, PM<sub>2.5</sub> and PM<sub>10</sub>) and CO. BC concentrations during the measurement period ranged between 0.3-29.9  $\mu\text{g m}^{-3}$  with a mean ( $\pm$ SD) value of 4.9 ( $\pm$ 3.8)  $\mu\text{g m}^{-3}$ . BC concentrations in Lumbini during pre-monsoon months are lower compared to BC concentrations observed in the Kathmandu Valley because of high number of vehicles plying on the street, brick kilns and other industries in Kathmandu valley (Sharma et al., 2012; Putero et al., 2015b). The lowest concentration was observed during a rainy day (21-22 April) whereas the highest concentration was observed during a period of forest fire (detailed in Section 3.4). For the entire measurement period, we found average (of hourly average values) PM<sub>1</sub>: 35.8 $\pm$ 25.6  $\mu\text{g m}^{-3}$  (minimum-maximum range: 3.6 - 197.6  $\mu\text{g m}^{-3}$ ), PM<sub>2.5</sub>: 53.1 $\pm$ 35.1  $\mu\text{g m}^{-3}$  (6.1 - 272.2  $\mu\text{g m}^{-3}$ ), PM<sub>10</sub>: 128.9 $\pm$ 91.9  $\mu\text{g m}^{-3}$  (10.5-603.9  $\mu\text{g m}^{-3}$ ) and coarse-mode (PM<sub>10-2.5</sub>): 75.65 $\pm$ 61.67  $\mu\text{g m}^{-3}$  (1.98-331.80  $\mu\text{g m}^{-3}$ ). The coarse-mode fraction was  $\sim$  60% of the PM<sub>10</sub>. The share of coarse-mode aerosol to PM<sub>10</sub> in Lumbini was higher than that observed in other sites in the IGP; Guwahiti, India (42%) (Tiwari et al., 2017) and Dibrugarh, India (9-16%) (Pathak et al., 2013) both in eastern IGP and Delhi (38%) (Tiwari et al., 2015) in western IGP indicating the higher contribution of coarse aerosols in Lumbini, likely lifted from soils from nearby agricultural fields and construction materials by stronger winds during pre-monsoon season. Similar value of coarse-mode fraction, as in Lumbini, has been reported by Misra et al. (2014) at Kanpur for dust dominated and mixed aerosols events.

The share of BC in PM fractions were found to be  $\sim$ 13% in PM<sub>1</sub>, 9% in PM<sub>2.5</sub> and  $\sim$ 4% in PM<sub>10</sub> but the correlation coefficients of BC with three PM fractions were found to be 0.89 (PM<sub>1</sub>), 0.88 (PM<sub>2.5</sub>) and 0.69 (PM<sub>10</sub>), indicating the commonality in the sources of these pollutants. The contribution of BC in PM<sub>1</sub> was found to be of  $\sim$ 12% in Kanpur during February-March (Kumar et al., 2016a) similar to Lumbini. Regarding the share of BC in PM<sub>10</sub>, the share observed in Lumbini ( $\sim$ 4%) was similar to that observed over Varanasi ( $\sim$ 340 km due south of our site) in central IGP (5%) (Tiwari et al., 2016) and Dibrugarh in eastern IGP ( $\sim$ 5%) (Pathak et al., 2013).

Thus our results indicate that despite our station being located at the northern edge of the IGP along the foothills of the Himalayan range, its aerosol characteristics are similar to those found in heavily polluted sites in the central and eastern IGP.

In Lumbini, the average (hourly) share of  $PM_1$  in  $PM_{2.5}$ ,  $PM_1$  in  $PM_{10}$  and  $PM_{2.5}$  in  $PM_{10}$  were found to be ~70%, 34% and 47% respectively. The share of average (sampling period) coarse-mode aerosols to  $PM_{10}$  (60%) was found to be higher as compared to that of average fine mode i.e.,  $PM_{2.5}$  (40%). Regarding other sites in IGP region,  $PM_{2.5}/PM_{10}$  ratios were reported to be 56% in Kanpur (Snider et al., 2016), 60% in Varanasi (Kumar et al., 2015), 57% in Guwahati (Tiwari et al., 2017), 90% in Dibrugarh (Pathak et al., 2013) and 62% in Delhi (Tiwari et al., 2015) indicating local differences within IGP as well as suggesting that influence of combustion sources at Lumbini is still lower compared to other locations in Indian section of the IGP. A recent study (Putero et al., 2015b) reported the  $PM_1/PM_{10}$  during pre-monsoon of 2013 was found to be 0.39 in the Kathmandu Valley of Nepal. Lumbini has significantly lower vehicle emissions and human population than the Kathmandu Valley yet the ratios are similar, indicating the importance of regional combustion sources in Lumbini for finer aerosols ( $PM_1$ ), and soil-based emissions such as road dust in the Kathmandu Valley. Future studies will need to explore the emission sources around Lumbini in much greater detail. Lower  $PM_{2.5}/PM_{10}$  in Lumbini as compared to other regions mentioned earlier could be due to emissions from cement industries located within 15 km distance from the measurement site. Cement factories emit coarse sized particles but we are not able to distinguish in our measurement without having an analysis of certain marker species. Trivedi et al. (2014) reported a ratio of 0.39 (during pre-monsoon) over Delhi, which is lower than the ratio in Lumbini. The lower ratio in Delhi was due to the presence of coarse sized windblown desert dust and suspended soil materials due to strong winds.

The observed 24-hour average particulate matter concentrations ( $PM_{2.5}$  and  $PM_{10}$ ) were found frequently higher than the WHO prescribed guidelines for  $PM_{2.5}$  ( $25 \mu g m^{-3}$ ) and  $PM_{10}$  ( $50 \mu g m^{-3}$ ) with  $PM_{2.5}$ : exceeding 94% and  $PM_{10}$ : 85% of the measurement period of 53 days.

Observed CO concentrations ranged between 124.9-1429.7 ppbv with an average value of  $344.1 \pm 160.3$  ppbv. CO concentration observed in Lumbini is lower than that of Mohali, Western India where the average concentration was 566.7 ppbv during pre-monsoon season due to intense biomass and agro-residue burning over the region (Sinha et al., 2014). Temporal variation of CO

concentrations is similar to that of BC as both of these species are emitted during incomplete combustion of fuel. Moreover, a very strong correlation ( $r = 0.9$ ) was observed between BC and CO. Past studies have shown that the ratio of BC to CO depends upon multiple factors like site location, combustion characteristics (fuel and technology) at the sources, and type of air mass (Girach et al., 2014; Pan et al., 2011; Zhou et al., 2009). Formation of the soot depends on the carbon to oxygen ratio of fuel whereas CO can also be produced naturally due to the oxidation of VOCs (Girach et al., 2014). Figure 7 shows the comparison of the average  $\Delta BC/\Delta CO$  ratio (0.021) at Lumbini with that obtained from other sites. Please refer to Figure S2 in the supplementary materials for the time series of  $\Delta BC/\Delta CO$  ratio observed in Lumbini. We used the method described by Pan et al. (2011) to calculate the  $\Delta BC/\Delta CO$  values. The ratio was calculated using the equation  $(BC - BC_0)/(CO - CO_0)$  assuming the background values ( $BC_0$  or  $CO_0$ ) as 1.25 percentile of the data. The  $\Delta BC/\Delta CO$  ratio in Lumbini is similar to that obtained at a suburban site, Pantnagar in India (0.017) (Joshi et al., 2016) and in Maldives (0.017) (Dickerson et al., 2002). As compared to Lumbini, the different  $\Delta BC/\Delta CO$  ratio obtained over megacities such as Beijing and Shanghai are due to the higher number of gasoline and diesel vehicles (Zhou et al., 2009). However, the ratio obtained at Lumbini were within the range of emission ratios from diesel used in transport sector (0.0013-0.055), coal (0.0019-0.0572) and biofuels (0.0087-0.0266) for domestic activities (Verma et al., 2010 and references therein). ~~BC to CO ratio in Lumbini was found to be different from that observed at other urban and rural sites and those affected by forest fire/biomass burning. However, a sub-urban site, Pantnagar, in IGP also observed similar BC to CO ratio (Joshi et al., 2016) as observed in Lumbini. There was a very strong correlation ( $r > 0.9$ ) between BC and CO (Supplementary material, Figure S2), indicating likely common sources of emission for both pollutants.~~ The hourly averaged observed ozone concentration ranged between 1.0 and 118.1 ppbv with a mean value of  $46.6 \pm 20.3$  ppbv during the sampling period. The 8-hr maximum  $O_3$  concentration exceeded WHO guidelines of  $100 \mu g m^{-3}$  (WHO, 2006) during 88% of the measurement period. Our results clearly indicate that the current pollution levels in Lumbini is of great concern to health of the people living in the region as well as over a million visitors who visit Lumbini, as well as ecosystems, particularly agro-ecosystem, especially in warm and sunny pre-monsoon months.

The relationship of wind speed (WS) with aerosol and gaseous pollutants in Lumbini is shown in Figure S3 (Supplementary information). We were interested in studying the relationship between

wind speed and the pollutants since the wind governs the horizontal dilution of the pollutants (Huang et al., 2012) and also likelihood of lifting soil dust. Except ozone, all other pollutants exhibited negative correlation with wind speed. BC shows negative correlation ( $r = -0.42$ ) with the wind speed which is similar with other pollutants as well (as can be seen from the figure). Past studies have also reported a similar negative correlation of BC with wind speed over urban and sub-urban areas (Huang et al., 2012; Cao et al., 2009; Ramachandran and Rajesh, 2007; Sharma et al., 2002; Tiwari et al., 2013) indicating that the locally generated BC can accumulate in the atmosphere during lower wind speed conditions (Cao et al., 2009). Tiwari et al. (2013) also reported similar negative correlation ( $r = -0.45$ ) during the pre-monsoon season over Delhi. On the other hand, secondary pollutants like ozone exhibited a positive relation with the WS ( $r=0.38$ ) indicating the WS could be one of the potential factors of high ozone in Lumbini. Solar radiation is one of the most important factors for production of ozone in the atmosphere (Naja et al., 2003). The correlation of hourly ozone concentration with solar radiation (not shown here) was found to be 0.41 whereas wind speed during the daytime only (06:00-18:00) showed very weak correlation of 0.02 with ozone, indicating the calm condition as conducive to formation and accumulation of ozone in the region. Interestingly, the highest concentrations of all measured pollutants were obtained when the wind speed was less than  $1 \text{ m s}^{-1}$ . In a separate analysis (not shown here), we considered only the WS  $>1 \text{ m s}^{-1}$  and calculated the correlation coefficients to investigate the influence of regional emissions. We found the similar correlation values as previous when all WS values were considered (BC vs WS = -0.41, CO vs WS = -0.42,  $\text{O}_3$  vs WS= 0.29,  $\text{PM}_{10}$  vs WS= -0.40,  $\text{PM}_{2.5}$  vs WS= -0.38,  $\text{PM}_{10}$  vs WS= -0.33). The correlation of WS ( $>1 \text{ m/s}$ ) with concentration of air pollutants elucidates that air pollution over Lumbini is not only of the local origin, it is rather transported from other nearby regions as well.

Past studies near this site have been focused on the cities like Kathmandu (Sharma et al., 2012; Ram et al., 2010; Panday and Prinn, 2009; Putero et al., 2015b) and Kanpur (Ram et al., 2010) and agro-residue burning dominated regions of IGP (Rastogi et al., 2016; Sinha et al., 2014; Sarkar et al., 2013) or a remote mountain location in India (Naja et al., 2014). Very high aerosol loading is observed in South Asia during pre-monsoon, mostly over the IGP region (Supplementary materials, Figure S4). ~~In order to put our results in perspective, pollution levels observed in Lumbini have been compared with the observations from other sites in the region~~

and are presented in Table 2. As this is the first study over an IGP site located in Nepal, pollution concentrations observed at Lumbini were compared with other sites in the region (Table 2). Different sites located at urban, semi-urban and remote locations were used for comparison to get a clear comparative picture of the situation at Lumbini amongst other locations in the region.  $PM_{2.5}$  concentration in Lumbini have been found to be lower than the megacity like Delhi (Bisht et al., 2015) and north-western IGP regions (Sinha et al., 2014) due to higher level of emissions (from traffic and biomass burning respectively) over those regions. Pre-monsoon seasonal average  $PM_{2.5}$  concentration in Lumbini has been found to be lower than the megacity like Delhi (Bisht et al., 2015) and north-western IGP (Sinha et al., 2014), possibly due to higher level of emissions (from traffic and biomass burning, respectively) over those regions. BC concentrations observed in Lumbini during pre monsoon season was lower than the urban Asian cities like Kathmandu (Putero et al., 2015a) and Delhi (Bisht et al., 2015), slightly higher than in Kanpur but high compared to the remote locations in the region. BC observed at Lumbini was higher by a factor of ~6 and ~4.5 compared to that at Mt. Abu, India (Das and Jayaraman, 2011) and near the base of Mt. Everest, Nepal (Marinoni et al., 2013) respectively. Regarding  $CO$ , concentration in Lumbini was ~1.5–5 times lower than other urban locations in India (Gaur et al., 2014; Sinha et al., 2014). However, Lumbini  $CO$  concentrations are ~2.3–2.6 times higher than nearby remote location such as Mt. Abu (Naja et al., 2003). Average  $O_3$  concentrations, over sampling period, in Lumbini were found to be higher than the cities like Kathmandu (Putero et al., 2015a). However, ozone concentrations higher than that observed at Lumbini were reported at nearby city of Kanpur during pre monsoon season (Gaur et al., 2014). Interestingly ozone concentrations higher than that at Lumbini were observed in the Mt. Everest region. Uplift of the polluted air masses (Marinoni et al., 2013), stratospheric intrusion (Cristofanelli et al., 2010) and even the regional or long range transport of the air pollutants (Bonasoni et al., 2010) might have contributed for the higher ozone concentration over the Everest region, resulting in higher  $O_3$  concentration compared to Lumbini. In addition, average BC and  $CO$  concentrations in Lumbini were found falling in between concentrations observed at rural sites (up to 6 times higher) and cities in the region (see Table 2), indicating that Lumbini can still be considered as semi-urban location. The hourly average  $O_3$  concentration in Lumbini were found to be higher than the cities like Kathmandu (Putero et al., 2015b) and Kanpur during pre-monsoon season (Gaur et al., 2014). However from a mesoscale perspective, the hourly average  $O_3$  concentrations were lower

at Lumbini as compared to base camp of Mt. Everest region due to the uplift of polluted air masses (Marinoni et al., 2013), stratospheric intrusion (Cristofanelli et al., 2010) and even the regional or long-range transport of the air pollutants (Bonasoni et al., 2010) to the high altitude site.

Regarding the monthly average concentration, the concentrations of all measured pollutants decreased as the pre-monsoon months advanced. The monthly average concentrations of the monitored species are shown in the Figure S5 along with the monthly fire hotspots over the region. Reduction in concentration (except PM) during the month of May (as compared to April) could be attributed to the fewer fire events during May as well as previously discussed washout by rainfall. Two peak pollution episodes were observed during the first half of April and May which is discussed in more detail in the next section.

### 3.2.2 Observation-model inter-comparison

Chemical transport models provide insight to observed phenomena; however, interpretation has to take into account model performance before arriving at any conclusion. This section describes pollution concentrations simulated by the WRF-STEM model. A comparison of model calculated pollutant concentration along with the minimum and maximum concentrations of various pollutants (with observation) is shown in Table 3. The model based concentrations used here are instantaneous values for every third hour of the day. BC concentrations ranged between 0.4-3.7  $\mu\text{g m}^{-3}$  with a mean value of  $1.8 \pm 0.7 \mu\text{g m}^{-3}$  for a period of 1<sup>st</sup> April-15<sup>th</sup> June 2013. The average model BC concentration was ~2.7 times lower than the observed BC. Regarding  $\text{PM}_{10}$ ,  $\text{PM}_{2.5}$  and  $\text{PM}_{10}$ , the model simulated average concentration was  $12.3 \pm 5.5$  (0.9-41.7)  $\mu\text{g m}^{-3}$ ,  $17.3 \pm 6.7$  (1.9-48.3)  $\mu\text{g m}^{-3}$  and  $25.4 \pm 12.9$  (2.1-68.8)  $\mu\text{g m}^{-3}$ , respectively. The model estimated values were lower by the factor of 3 and 5 respectively than the observed concentrations. The data show that model needs much improvement in its ability to adequately predict observed aerosol characteristics. Since pollutant concentration is a function of emissions, transport and transformation and deposition, improvements in any of these areas would improve the model. However, given observation insights by PM ratios, it seems that improvements are much needed in the emissions of primary aerosols. Current emissions does not account for trash burning, roadside dust and increasing newer industries, especially emissions from cement factories that have propped up in recent years.

Similarly, Average **observed** CO concentration was  $255.7 \pm 83.5$  ppbv, ranging between 72.2-613.1 ppbv, with average model CO  $\sim 1.35$  times lower than observed. **Comparison of modeled CO versus observation is shown in Figure 6. Apart from two peak episodes the model does a better job in predicting CO concentration over Lumbini.** Previous study using the STEM model over Kathmandu valley showed **that** the model was able to capture annual BC mean value but completely missed the concentrations during pre-monsoon and post monsoon period (Adhikary et al., 2007). Similar behavior is seen this time for CO where the model misses the peak values but reasonably captures CO concentration after mid-May. ~~Even though the model calculated values are lower in the present study, the model captures the synoptic variability fairly well for all the pollutants compared.~~ STEM model **CO** performance can be significantly improved via better constraining ~~anthropogenic emissions inventory~~, emissions of open biomass burning **as discussed in Section 3.3.** ~~(natural and anthropogenic) and improvements in meteorological output from WRF amongst many other uncertainties inherent in regional chemical transport model.~~ This activity is beyond the scope of this current paper although the improvements are underway for all these sectors.

### **3.2.3 Diurnal variations of air pollutants and boundary layer height**

In the emission source region, diurnal variations of primary pollutants provide information about the time dependent emission activities (Kumar et al., 2016b). **Figure 8** shows the diurnal variation of hourly averaged concentrations of ~~various~~ measured pollutants during the sampling period. Primary pollutants like **BC, PM and CO** showed typical characteristics of an urban environment, i.e., diurnal variation with a morning and an evening peak. However, Lumbini data shows higher concentrations in the evenings compared to morning hours. Elevated concentrations can be linked to morning and evening cooking hours for BC and CO where emission inventory show that residential sector has significant contribution. However, explanation for elevated evening concentration compared to morning needs further investigation. Increase in the depth of boundary layer, reduction in the traffic density on the roads, absence of open biomass burning during mid-day and increasing wind speed often contribute to the dispersion of pollutants resulting in lower concentration during afternoon. Diurnal variation of wind direction (Supplementary information, Figure S1, ~~lower~~ **upper** panel) shows the dominance of wind coming from south (mainly during the month of May and till mid-June). Morning and

evening period experienced the winds coming from the southeast direction while the winds were predominantly from southwest direction during late afternoon. Increase in CO concentrations in the evening hours might be due to transport of ~~higher levels~~ of CO ~~emissions~~ from source regions upwind of Lumbini which along with the local emissions **which** gets trapped under lower Planetary Boundary Layer (PBL) heights in evening and night time. Ozone concentration was lowest in the morning before the sunrise and highest in late afternoon around 15:00 PM after which concentrations started declining, exhibiting a typical characteristic of a polluted urban site. Photo-dissociation of accumulated NO<sub>x</sub> reservoirs (like HONO) provides sufficient NO concentration leading to the titration of O<sub>3</sub> resulting in minimum O<sub>3</sub> just before sunrise (Kumar et al., 2016b). The PBL height (in meters (m)) was obtained from the **WRF** model as observations were not available. **Figure 9** shows the diurnal variation of the model derived PBL height. The study period average PBL height over Lumbini was ~ 910 m (ranging between 24.28 and 3807 m observed at 06:00 and 15:00 h respectively). As the pre-monsoon month advances, PBL height also increased. The monthly average PBL height was 799 m, 956 m and 1014 m respectively during the month of April, May and (1<sup>st</sup>-15<sup>th</sup>) June. ~~Over the IGP region, PBL height is deeper during the pre-monsoon compared to monsoon (Patil et al., 2014), post-monsoon (Hegde et al., 2009) and winter (Badarinath et al., 2009) seasons.~~ The fluctuations of **modeled** PBL height correspond well with the diurnal variation of **observed** the pollutants like BC, CO and PM with the period of lower boundary height experiencing higher pollution concentration.

### **3.3 Influence of forest fires on Lumbini air quality**

#### **3.3.1 Identification of forest fire influence over large scale using in-situ observations satellite and model data**

Forest fires and **agricultural** biomass burning (mostly agro-residue burning in large scale) are common over the South Asia and the IGP region during pre-monsoon season. North Indo-Gangetic region is characterized by fires even during the monsoon and post-monsoon season (Kumar et al., 2016b; Putero et al., 2014). These activities influence air quality not only over nearby regions but also get transported towards high elevation pristine environments like **Mt.** Everest (Putero et al., 2014) and Tibet (Cong et al., 2015a; 2015b). So, one of the main objectives of this study was to identify the influence of open burning on Lumbini air quality. Average wind speed during the whole measurement period was 2.4 m s<sup>-1</sup>. Based on this data,

open fire counts within the grid size of 200×200 km centering over Lumbini was used for this analysis assuming that the emissions will take a maximum period of one day to reach our monitoring site. Forest fire counts were obtained from MODIS satellite data product called Global Monthly Fire Location Products- (MCD14ML). More on this product has already been described by Putero et al. (2014). Figure 10 shows the daily average ~~in-situ~~ CO, BC  $\Delta BC/\Delta CO$  ratio, aerosol absorption Ångstrom exponent (AAE) which is derived from Aethalometer data and daily open fire count within the specified grid. The green box in the figure is used to show two ~~outstanding~~ peak events (presented earlier in Fig. 6) with the elevated BC and CO concentrations observed during the monitoring period. The first peak was observed during 7-9 April and second peak during 3-4 May, 2013. Two pollutants having biomass burning as the potential primary source: BC and CO were taken in consideration. AAE values higher during these two events (~ 1.6) are also an indication of presence of BC of biomass burning origin. ~~Ground based TSP sampling also showed higher concentration of biomass burning tracer (potassium or K<sup>+</sup>) in Lumbini during the pre-monsoon season comparing to other seasons of the year (L. Tripathee, personal communication).~~ The chemical composition of TSP filter samples collected at Lumbini also showed higher concentration of Levoglucosan, a biomass burning tracer in Lumbini during the pre-monsoon season as compared to other seasons of the year (Wan et al., 2016, Manuscript under review for ACPD). Wan et al. (2016) also reported that the higher correlation between K<sup>+</sup> with tracers of dust (Ca<sup>2+</sup> and Mg<sup>2+</sup>) indicated that dust is the main source of potassium in Lumbini.

Contrary to ~~But,~~ to our expectation, we could not observe any significant influence of forest fire within the specified grid of 200x200 km (or the influence of local forest fire on the air quality over Lumbini was not observed). Therefore, a wider area, covering South and Southeast Asian regions, was selected for the forest fire count. Figure 11 (A-B) shows the active fire hotspots from MODIS, over the region, during the peak events which shows the first peak occurred due to the forest fire over the eastern India region whereas the second peak was influenced by the forest fire over western IGP region. Moreover, in order to strengthen our hypothesis, we have utilized satellite data products for various gaseous pollutants like CO and NO<sub>2</sub> (Atmospheric Infrared Sounder (AIRS) for CO and Ozone Monitoring Instrument (OMI) for NO<sub>2</sub> both obtained from Giovanni platform). Figure 11 (C-H) shows the daytime total column CO before, during and after occurrence of two events (peaks) as stated earlier. Atmospheric Infrared Sounder (AIRS)

satellite with daily temporal resolution and  $1^{\circ} \times 1^{\circ}$  spatial resolution have been utilized to understand the CO concentration over the area. CO concentration over Lumbini during both of the peaks confirmed the role of open fires on either sides of the IGP region for elevated concentration of CO over Lumbini. To further strengthen our finding, the aid of wind rose plot of local wind speed and direction was taken. Figure 11 (I-J) represent the wind rose plot only for these two events respectively. Wind rose plots also confirm the wind blowing from those two forest fire regions affected the air quality in Lumbini region. Figure 11 (K) shows model biomass CO peak coincident with observed CO. Although the magnitudes are significantly different, the timing of the peaks is well captured by the model. However, This we believe is due to the fact that satellite based open fire detection also has limitation as it does not capture numerous small fires that are prevalent over south Asia which usually burn out before the next satellite overpass. More research is needed to assess the influence of these small fires on regional air quality.

In a separate analysis (not shown here), elevated  $O_3$  concentration during these two events were also observed. Average  $O_3$  concentration before, during and after the events were found to be  $46.2 \pm 20.3$  ppbv,  $53.5 \pm 31.1$  ppbv and  $50.3 \pm 20.9$  ppbv respectively (Event-I) whereas it was found to be  $54.8 \pm 23.8$  ppbv,  $56.7 \pm 35$  ppbv and  $55.6 \pm 13.4$  ppbv respectively (Event-II). Increased ozone concentrations during the high peak events have been analyzed using the satellite  $NO_2$  concentration over the region considering the role of  $NO_2$  as precursor for ozone formation. Daily total column  $NO_2$  were obtained from OMI satellite (data available at the Giovanni platform; <http://giovanni.gsfc.nasa.gov/giovanni/>) at the spatial resolution of  $0.25^{\circ} \times 0.25^{\circ}$ . Figure 12 shows the  $NO_2$  column value before, during and after both events. Even for the  $NO_2$ , maximum concentrations were observed during these two special events.

### 3.3.2 Identifying regional and local contribution

WRF-STEM model has been used to identify the anthropogenic emission source region influencing the air quality over Lumbini. As previously explained, the model is able to capture the observed CO concentration when intense open burning events were not present. An attempt has been undertaken to identify the source region contribution, utilizing the WRF-STEM model results, for the CO concentrations observed at Lumbini. A recent study (Kulkarni et al., 2015) has explored the source region contribution of various pollutants over the Central Asia using similar technique the same model. Figure 13 (A) shows the average contribution from different

regions on CO concentration over Lumbini during the whole measurement period. Major share of CO was from the Ganges valley (46%) followed by Nepal region (25%) and rest of Indian region (~17.5%). Contribution from other South Asian countries like Bangladesh and Pakistan were ~ 11% whereas China contributed for ~1% of the CO concentration in Lumbini. Regarding the monthly average contribution, the Ganges Valley and Nepal's contribution were almost equal during the month of April (~34% and ~37% respectively) but increased for the Ganges Valley region during the month of May (~44%) and got reduced for Nepal region (~25%) (Figure S6).

Figure 13 (B) is the time series of percentage contribution to total CO concentration during whole measurement period showing different air mass arriving at a 3 hourly intervals. During the whole measurement period, majority of the CO reaching Lumbini were from the Ganges valley (mainly the states of Punjab, Haryana, Uttar Pradesh, Bihar and West Bengal) region with the contribution sometimes reaching up to ~80%. Other India (central, south, east and north) regions also contributed significantly. Bangladesh's contribution in CO loading was seen only after mid-April lasting for only about a week and after the first week of May. The contribution from Bangladesh was sporadic comparing to other regions. Highest contribution from this Bangladesh region was observed after the first week of June with the arrival of monsoonal air mass. Pakistan also contributed for the CO loading significantly. Others region as mentioned in the figure covered the regions like Afghanistan, Middle east, West Asia, East Asia, Africa and Bhutan. Contributions from these regions were less than 5%. Contribution from China was not evident till the first week of June where a specific air mass arrival shows contribution reaching up to 25% of total CO loading.

A sensitivity analysis was performed for emission uncertainty in the model grid containing Lumbini. Lumbini and surrounding regions in the recent years has seen significant rise in urban activities and industrial activity and related emissions which may not be accurately reflected in the HTAPv2 emissions inventory. A month long simulation was carried out with emissions from Lumbini and the surrounding four grids off and another simulation with Lumbini and surrounding four grid's emissions scaled increased by 5 times the amount from HTAPv2 emissions inventory. The results are shown in Figure 13 (C) as percentage increase or decrease compared to model results using the current HTAPv2 emissions inventory. The black line shows concentration as 100% for the current HTAPv2 emissions inventory. Despite making Lumbini

and the surrounding grids emissions zero, model calculation shows pollutant concentration on average is still about 78% of the original value indicating dominance of background and regional sources compared to local source in the model. Increasing emissions 5 times for the Lumbini and surrounding four grids only increases the concentration on average by 151%. Thus uncertainty in emissions are not a local uncertainty for Lumbini rather for the whole region which needs to be better understood for improving model performance against observations at Lumbini.

### **3.4 Contribution of aerosol composition to local air quality as identified by the model**

The chemical composition of  $PM_{2.5}$  obtained from the model is shown in Figure 13. Carbonaceous aerosols and sulfate pollutants contributed two-third fraction of the fine mode particulate matter ( $PM_{2.5}$ ). Organic carbon (OC) was found as the main constituent of the  $PM_{2.5}$  contributing ~45% to  $PM_{2.5}$ . For Lumbini, the contribution of modeled BC to  $PM_{2.5}$  was ~10% similar to the observed (9.2%) fraction of BC to  $PM_{2.5}$ . Recent study conducted over nearby IGP site, Kanpur (Ram and Sarin, 2011) found the average share of OC and EC in  $PM_{2.5}$  to be ~45% and ~5% respectively which is close to the values obtained by our model based calculation. Natural aerosols mainly wind blown mineral dust was ~25% of the fine mode PM in Lumbini. Highest loading of dust is observed during the late dry period to early monsoon season in South Asian region (Adhikary et al., 2007). Sulfate contributed for ~20% share of the  $PM_{2.5}$  over Lumbini. Although the post monsoon season observed highest concentration of sulfate in South Asian region, elevated concentration are observed even during the April over Ganges Valley (Adhikary et al., 2007). As expected, very minimal contribution from sea salts (less than 1%) was observed at Lumbini.

### **3.5 Does fossil fuel or biomass influence the Lumbini air?**

The aerosol spectral absorption is used to gain insight into nature and potential source of black carbon. This method enables to analyze the contributions of fossil fuel combustion and biomass burning contributions to the observed BC concentration (Kirchstetter et al., 2004). Besides BC, other light absorbing (in the UV region) aerosols are also produced in course of combustion, collectively termed as organic aerosols (often also called brown carbon or BrC) (Andreae and Gelencsér, 2006). Figure 14 shows the comparison of normalized light absorption as function of the wavelength for BC observed at Lumbini during cooking and non-cooking hours. Our results

are compared with the published data of Kirchstetter et al. (2004) and that observed over a village center site of Project Surya in the IGP (Praveen et al., 2012) (figure not shown). We discuss light absorption data from two distinct times of the day. The main reason behind using data during 07:00-08:00 h and 16:00-17:00 h is these periods represent highest and lowest ambient concentration (Fig. 8). Also these period represent cooking and non-cooking or high and low vehicular movement hours (Praveen et al., 2012). To understand the influence of biomass and fossil fuel we plotted normalized aerosol absorption at 700 nm wavelength for complete aethalometer measured wavelengths in Fig. 14. Kirchstetter et al. (2004) reported OC absorption efficiency at 700 nm to be zero. Thus we normalized measured absorption spectrum by 700 nm wavelength absorption. Since aethalometer does not provide 700 nm wavelength absorption values, we used methodology followed by Praveen et al. (2012). Our results show that the normalized absorption for biomass burning aerosol is ~3 times higher at 370 nm compared to that at 700 nm whereas fossil fuel absorption is about 2.6 times higher at the same wavelength. The normalized curve obtained during both cooking and non-cooking period lies in between the standard curve of Kirchstetter et al. (2004). ~~The curve during the prime cooking time is much close to the biomass curve of published data (including that during the cooking period over the village center site of Project Surya) whereas that during non-cooking time (afternoon period) is inclined towards the fossil fuel curve.~~ As shown in Fig. 13, the curve obtained for the prime cooking time is closer towards the published curve on biomass burning whereas that obtained during the non-cooking time is closer towards the published fossil fuel curve. Similar result was also observed over the Project Surya village in the IGP region (Praveen et al., 2012; Rehman et al., 2011). This clearly indicates there is contribution of both sources: biomass as well as fossil fuel on the observed BC concentration over Lumbini.

In order to identify fractional contribution of biomass burning and fossil fuel combustion to observed BC aerosol, we adopted the method described by Sandradewi et al. (2008). Wavelength dependence of aerosol absorption coefficient ( $b_{\text{abs}}$ ) is proportional to  $\lambda^{-\alpha}$  where  $\lambda$  is the wavelength and  $\alpha$  is the absorption Ångstrom exponent. The  $\alpha$  values ranges from 0.9-2.2 for fresh wood smoke aerosol (Day et al., 2006) and between 0.8-1.1 for traffic or diesel soot (references in Sandradewi et al. (2008)). We have taken  $\alpha$  value of 1.86 for biomass burning and 1.1 for fossil fuel burning as suggested by previous literature (Sandradewi et al., 2008). Figure 15 shows diurnal variation of the biomass burning BC. Minimum contribution of biomass

burning to total BC concentration was observed during 04:00-06:00 local time (only about 30% of the total BC). As the cooking activities start in morning, the contribution of biomass BC starts to increase and reaches about 50%. Similar pattern was repeated during evening cooking hours. Only during these two cooking periods, fossil fuel fraction BC was lower. Otherwise it remained significantly higher than biomass burning BC throughout the day. On average, ~40% of BC was from biomass burning whereas remaining 60% was contributed by fossil fuel combustion during our measurement period. Interestingly, this is the opposite of the contributions that were concluded by Lawrence and Lelieveld (2010). Lawrence and Lelieveld (2010) concluded that ~60% BC from biomass versus ~40% fossil fuel, based on a review of numerous previous studies to be likely for the outflow from Southern Asia during the winter monsoon. When we compared observed Ångström exponent with Praveen et al. (2012), we noticed that Lumbini values were lower than Project Surya Village center site. This implies Surya village center had higher biomass fraction, also it was observed absorption Ångström exponent exceeded 1.86 during cooking hours which indicates 100% biomass contribution. The difference is attributed to the fact that Lumbini sampling site is not a residential site like Surya village which can capture cooking influence efficiently. Further Lumbini sampling site is surrounded by commercial activities such as a local bus park, hotels, office buildings and industries and brick kilns slightly further away. Although the reason for this difference is not clear, it is an indication of the important role of diesel and coal emissions in the Lumbini and upwind regions.

#### 4. Conclusions

Our measurements, a first for the Lumbini area, have shown very high pollution concentration at Lumbini. Black carbon (BC), carbon monoxide (CO), ozone (O<sub>3</sub>) and particulate matter (PM<sub>10</sub>, PM<sub>2.5</sub> and PM<sub>1</sub>) were measured during the pre-monsoon of 2013 as a regional site of the *SusKat-ABC campaign*. Average pollutant concentrations during the monitoring period were found to be: BC:  $4.9 \pm 3.8 \mu\text{g m}^{-3}$ ; CO:  $344.1 \pm 160.3 \text{ ppbv}$ ; O<sub>3</sub>:  $46.6 \pm 20.3 \text{ ppbv}$ ; PM<sub>10</sub>:  $128.8 \pm 91.9 \mu\text{g m}^{-3}$ ; PM<sub>2.5</sub>:  $53.14 \pm 35.1 \mu\text{g m}^{-3}$  and **PM<sub>1</sub>:  $36.6 \pm 25.7 \mu\text{g m}^{-3}$**  which is comparable with other urban sites like Kanpur and Delhi in the IGP region. However, our study finds higher fraction of coarse mode PM in Lumbini as compared to other sites in the IGP region. In addition,  $\Delta\text{BC}/\Delta\text{CO}$  ratio obtained in Lumbini was within the range of emission from both domestic and transportation sectors, indicating them as potential key sources of BC and CO, and likely most of PM<sub>1</sub> in

Lumbini. The diurnal variation of the pollutants is similar to that of any urban location, with peaks during morning and evening. However, our results show higher evening concentration compared to morning concentration values and needs further research to explain this behavior. During our measurement period, air quality in Lumbini was influenced by regional forest fires as shown by chemical transport model and satellite data analysis. A regional chemical transport model, WRF-STEM was used to interpret observations. Inter-comparison of WRF-STEM model outputs with observations showed that the model underestimated the observed pollutant concentrations by a factor of 1.5 to 5 but was able to capture the temporal variability. Nonetheless, ~~WRF-STEM model was able to simulate the synoptic variability of observed pollutants.~~ Model uncertainties are attributed mostly to uncertainties in meteorology and regional emissions as shown from sensitivity analysis with local emissions. Region-tagged CO as air-mass tracers are employed in WRF-STEM model to understand the anthropogenic emission source region influencing Lumbini. Our analysis shows that the adjacent regions; mostly the Ganges valley, other parts of India and Nepal accounted for the highest contribution to pollutant concentration in the Lumbini. ~~Anthropogenic pollutants in PM<sub>2.5</sub> were dominant, with OC and BC contributing ~45% and ~10%, respectively while sulfate aerosol contributed to 20%, whereas natural pollutants like mineral dust contributed ~25%.~~ The normalized light absorption curve clearly indicated the contribution to BC in Lumbini from both sources: biomass as well as fossil fuel. On average, ~40% BC was found to be from the biomass burning and ~60% from fossil fuel burning.

Various improvements and extensions would be possible in future studies. More reliable functioning of the AWS (temperature and RH sensor, rain gauge) would have allowed more in-depth analysis of the relationship between meteorological parameters and pollutants concentration. Continuous measurements of air pollutants throughout the year would allow for annual and seasonal variation study. Improvements in the model are much needed in its ability to simulate observed meteorology. Significant uncertainty lies with regional emissions inventory developed at national and continental scale versus local bottoms up inventory and pollutant emissions from small scale open burning not captured by satellites.

There is a clear need for setting up of a continuous air quality monitoring station at Lumbini (UNESCO World Heritage Site) and the surrounding regions for long-term air quality

monitoring. ~~In order to fully safeguard the valuable world heritage properties as well as public health and agro-ecosystems in the region from impacts of air pollution, development activities within the Kenzo Tange Master Plan Area and Lumbini Protected Zone (LPZ) need to go through a rigorous environmental impact assessment (EIA) and heritage impact assessment (HIA) in accordance with the decisions of the UNESCO World Heritage Committee.~~

## **Data availability**

The data used for this manuscript can be obtained by sending an email to the corresponding authors and/or to IASS ([Maheswar.Rupakheti@iass.potsdam.de](mailto:Maheswar.Rupakheti@iass.potsdam.de)) and/or to ICIMOD ([arnico.panday@icimod.org](mailto:arnico.panday@icimod.org)). Modeling ~~codes~~ **data** can be obtained from B. Adhikary ([Bhupesh.adhikary@icimod.org](mailto:Bhupesh.adhikary@icimod.org)).

## **Authors' contributions**

M.R. and M.L. conceived the **Lumbini portion of the SusKat** experiment. M.R. and A.K.P. coordinated the **Lumbini** field campaign. D.R. and K.S.M conducted the field observations **at Lumbini**. B.A. designed and ran the WRF-STEM model. P.S.P., B.A. and D.R. finalized the manuscript composition. D.R., P.S.P, B.A., M.R. and S.K. conducted the data analysis. D.R. **and B.A.** prepared the manuscript with inputs from all coauthors.

## **Acknowledgements**

This study was partly supported by the Institute for Advanced Sustainability Studies (IASS), Germany, the International Centre for Integrated Mountain Development (ICIMOD), and the National Natural Science Foundation of China (41121001, 41225002), and the Strategic Priority Research Program (B) of the Chinese Academy of Sciences (XDB03030504). Dipesh Rupakheti is supported by CAS-TWAS President's Fellowship for International PhD Students. **The IASS is grateful for its funding from the German Federal Ministry for Education and Research (BMBF) and the Brandenburg Ministry for Science, Research and Culture (MWFK).** ICIMOD authors would like to acknowledge that this study was partially supported by core funds of ICIMOD contributed by the governments of Afghanistan, Australia, Austria, Bangladesh, Bhutan, China, India, Myanmar, Nepal, Norway, Pakistan, Switzerland, and the United Kingdom. The views and

802 interpretations in this publication are those of the authors and are not necessarily attributable to  
803 the institutions they are associated with. We thank B. Kathayat, B.R. Bhatta, and Venerable  
804 Vivekananda and his colleagues (Panditarama Lumbini International Vipassana Meditation  
805 Center) for providing logistical support which was vital in setting up and running the site. We  
806 also thank C. Cüppers and M. Pahlke of the Lumbini International Research Institute (LIRI) for  
807 providing the space and power to run the instruments at the LIRI premises. Satellite data providers  
808 (MODIS, AIRS, OMI) are also equally acknowledged.

809

## 810    **References**

- 811    Adhikary, B., Carmichael, G. R., Tang, Y., Leung, L. R., Qian, Y., Schauer, J. J., Stone, E. A.,  
812        Ramanathan, V., and Ramana, M. V.: Characterization of the seasonal cycle of south Asian aerosols:  
813        A regional-scale modeling analysis, *J. Geophys. Res.*, 112, D22S22, doi: 10.1029/2006jd008143,  
814        2007.
- 815    Andreae, M. O., and Gelencsér, A.: Black carbon or brown carbon? The nature of light-absorbing  
816        carbonaceous aerosols, *Atmos. Chem. Phys.*, 6, 3131-3148, doi: 10.5194/acp-6-3131-2006, 2006.
- 817    ~~Badarinath, K., Sharma, A. R., Kharol, S. K., and Prasad, V. K.: Variations in CO, O<sub>3</sub> and black carbon~~  
818        ~~aerosol mass concentrations associated with planetary boundary layer (PBL) over tropical urban~~  
819        ~~environment in India, *J. Atmos. Chem.*, 62, 73-86, doi: 10.1007/s10874-009-9137-2, 2009.~~
- 820    Baedecker, P. A., Reddy, M. M., Reimann, K. J., and Sciammarella, C. A.: Effects of acidic deposition on  
821        the erosion of carbonate stone — experimental results from the U.S. National Acid Precipitation  
822        Assessment Program (NAPAP), *Atmos. Environ.*, 26, 147-158, doi: 10.1016/0957-1272(92)90018-N,  
823        1992.
- 824    Bergin, M. H., Tripathi, S. N., Jai Devi, J., Gupta, T., McKenzie, M., Rana, K., Shafer, M. M., Villalobos,  
825        A. M., and Schauer, J. J.: The Discoloration of the Taj Mahal due to Particulate Carbon and Dust  
826        Deposition, *Environ. Sci. Technol.*, 49, 808-812, doi: 10.1021/es504005q, 2015.
- 827    Bisht, D. S., Dumka, U. C., Kaskaoutis, D. G., Pipal, A. S., Srivastava, A. K., Soni, V. K., Attri, S. D.,  
828        Sateesh, M., and Tiwari, S.: Carbonaceous aerosols and pollutants over Delhi urban environment:  
829        Temporal evolution, source apportionment and radiative forcing, *Sci. Total Environ.*, 521-522C, 431-  
830        445, doi: 10.1016/j.scitotenv.2015.03.083, 2015.
- 831    Bonasoni, P., Laj, P., Marinoni, A., Sprenger, M., Angelini, F., Arduini, J., Bonafè, U., Calzolari, F.,  
832        Colombo, T., Decesari, S., Di Biagio, C., di Sarra, A. G., Evangelisti, F., Duchi, R., Facchini, M. C.,  
833        Fuzzi, S., Gobbi, G. P., Maione, M., Panday, A., Roccato, F., Sellegri, K., Venzac, H., Verza, G. P.,  
834        Villani, P., Vuillermoz, E., and Cristofanelli, P.: Atmospheric Brown Clouds in the Himalayas: first  
835        two years of continuous observations at the Nepal Climate Observatory-Pyramid (5079 m), *Atmos.*  
836        *Chem. Phys.*, 10, 7515-7531, doi: 10.5194/acp-10-7515-2010, 2010.
- 837    Brimblecombe, P.: The effects of air pollution on the built environment, Imperial College Press, London,  
838        2003.
- 839    Burney, J., and Ramanathan, V.: Recent climate and air pollution impacts on Indian agriculture, *Proc.*  
840        *Natl. Acad. Sci. USA*, 111, 16319-16324, doi: 10.1073/pnas.1317275111, 2014.
- 841    Cao, J.-J., Zhu, C.-S., Chow, J. C., Watson, J. G., Han, Y.-M., Wang, G.-h., Shen, Z.-x., and An, Z.-S.:  
842        Black carbon relationships with emissions and meteorology in Xi'an, China, *Atmospheric Research*,  
843        94, 194-202, <http://dx.doi.org/10.1016/j.atmosres.2009.05.009>, 2009.
- 844    Cong, Z., Kang, S., Kawamura, K., Liu, B., Wan, X., Wang, Z., Gao, S., and Fu, P.: Carbonaceous  
845        aerosols on the south edge of the Tibetan Plateau: concentrations, seasonality and sources, *Atmos.*  
846        *Chem. Phys.*, 15, 1573-1584, doi: 10.5194/acp-15-1573-2015, 2015a.
- 847    Cong, Z., Kawamura, K., Kang, S., and Fu, P.: Penetration of biomass-burning emissions from South  
848        Asia through the Himalayas: new insights from atmospheric organic acids, *Sci. Rep.*, 5, doi:  
849        10.1038/srep09580, 2015b.
- 850    Cristofanelli, P., Bracci, A., Sprenger, M., Marinoni, A., Bonafè, U., Calzolari, F., Duchi, R., Laj, P.,  
851        Pichon, J. M., Roccato, F., Venzac, H., Vuillermoz, E., and Bonasoni, P.: Tropospheric ozone  
852        variations at the Nepal Climate Observatory-Pyramid (Himalayas, 5079 m a.s.l.) and influence of  
853        deep stratospheric intrusion events, *Atmos. Chem. Phys.*, 10, 6537-6549, doi: 10.5194/acp-10-6537-  
854        2010, 2010.
- 855    Das, S. K., and Jayaraman, A.: Role of black carbon in aerosol properties and radiative forcing over  
856        western India during premonsoon period, *Atmos. Res.*, 102, 320-334, doi:  
857        10.1016/j.atmosres.2011.08.003, 2011.

- Day, D., Hand, J., Carrico, C., Engling, G., and Malm, W.: Humidification factors from laboratory studies of fresh smoke from biomass fuels, *J. Geophys. Res.*, 111, D22202, doi: 10.1029/2006JD007221, 2006.
- Dickerson, R. R., Andreae, M. O., Campos, T., Mayol-Bracero, O. L., Neusuess, C., and Streets, D. G.: Analysis of black carbon and carbon monoxide observed over the Indian Ocean: Implications for emissions and photochemistry, *Journal of Geophysical Research: Atmospheres*, 107, INX2 16-11-INX12 16-11, 10.1029/2001JD000501, 2002.
- Duchi, R., Cristofanelli, P., Marinoni, A., Laj, P., Marcq, S., Villani, P., Sellegri, K., Angelini, F., Calzolari, F., Gobbi, G. P., Verza, G. P., Vuillermoz, E., Sapkota, A., and Bonasoni, P.: Continuous observations of synoptic-scale dust transport at the Nepal Climate Observatory-Pyramid (5079 m a.s.l.) in the Himalayas, *Atmos. Chem. Phys. Discuss.*, 11, 4229-4261, doi: 10.5194/acpd-11-4229-2011, 2011.
- Forouzanfar, M. H., Alexander, L., Anderson, H. R., Bachman, V. F., Biryukov, S., Brauer, M., Burnett, R., Casey, D., Coates, M. M., and Cohen, A.: Global, regional, and national comparative risk assessment of 79 behavioural, environmental and occupational, and metabolic risks or clusters of risks in 188 countries, 1990–2013: a systematic analysis for the Global Burden of Disease Study 2013, *Lancet*, 386, 2287-2323, doi: 10.1016/S0140-6736(15)00128-2, 2015.
- Ganguly, D., Jayaraman, A., Rajesh, T. A., and Gadhave, H.: Wintertime aerosol properties during foggy and nonfoggy days over urban center Delhi and their implications for shortwave radiative forcing, *J. Geophys. Res.*, 111, D15217, doi: 10.1029/2005jd007029, 2006.
- Gaur, A., Tripathi, S. N., Kanawade, V. P., Tare, V., and Shukla, S. P.: Four-year measurements of trace gases (SO<sub>2</sub>, NO<sub>x</sub>, CO, and O<sub>3</sub>) at an urban location, Kanpur, in Northern India, *J. Atmos. Chem.*, 71, 283-301, doi: 10.1007/s10874-014-9295-8, 2014.
- Gauri, K. L., and Holdren, G.: Pollutant effects on stone monuments, *Environ. Sci. Technol.*, 15, 386-390, doi: 10.1021/es00086a001, 1981.
- Girach, I. A., Nair, V. S., Babu, S. S., and Nair, P. R.: Black carbon and carbon monoxide over Bay of Bengal during W\_ICARB: Source characteristics, *Atmospheric Environment*, 94, 508-517, <http://dx.doi.org/10.1016/j.atmosenv.2014.05.054>, 2014.
- ~~Hegde, P., Pant, P., and Bhavani Kumar, Y.: An integrated analysis of lidar observations in association with optical properties of aerosols from a high altitude location in central Himalayas, *Atmos. Sci. Lett.*, 10, 48-57, doi: 10.1002/asl.209, 2009.~~
- Huang, X.-F., Sun, T.-L., Zeng, L.-W., Yu, G.-H., and Luan, S.-J.: Black carbon aerosol characterization in a coastal city in South China using a single particle soot photometer, *Atmospheric Environment*, 51, 21-28, <http://dx.doi.org/10.1016/j.atmosenv.2012.01.056>, 2012.
- IPCC: Climate Change 2013: The Physical Science Basis. Contribution of Working Group I to the Fifth Assessment Report of the Intergovernmental Panel on Climate Change [Stocker, T.F., D. Qin, G.-K. Plattner, M. Tignor, S.K. Allen, J. Boschung, A. Nauels, Y. Xia, V. Bex and P.M. Midgley (eds.)], 2013.
- Joshi, H., Naja, M., Singh, K., Kumar, R., Bhardwaj, P., Babu, S. S., Satheesh, S., Moorthy, K. K., and Chandola, H.: Investigations of aerosol black carbon from a semi-urban site in the Indo-Gangetic Plain region, *Atmos. Environ.*, 125, 346-359, doi: 10.1016/j.atmosenv.2015.04.007, 2016.
- Kirchstetter, T. W., Novakov, T., and Hobbs, P. V.: Evidence that the spectral dependence of light absorption by aerosols is affected by organic carbon, *J. Geophys. Res.*, 109, D21208, doi:10.1029/2004JD004999, 2004.
- Kulkarni, S., Sobhani, N., Miller-Schulze, J. P., Shafer, M. M., Schauer, J. J., Solomon, P. A., Saide, P. E., Spak, S. N., Cheng, Y. F., Denier van der Gon, H. A. C., Lu, Z., Streets, D. G., Janssens-Maenhout, G., Wiedinmyer, C., Lantz, J., Artamonova, M., Chen, B., Imashev, S., Sverdluk, L., Deminter, J. T., Adhikary, B., D'Allura, A., Wei, C., and Carmichael, G. R.: Source sector and region contributions to BC and PM<sub>2.5</sub> in Central Asia, *Atmos. Chem. Phys.*, 15, 1683-1705, doi: 10.5194/acp-15-1683-2015, 2015.

- Kumar, B., Chakraborty, A., Tripathi, S. N., and Bhattu, D.: Highly time resolved chemical characterization of submicron organic aerosols at a polluted urban location, *Environmental Science: Processes & Impacts*, 18, 1285-1296, 10.1039/C6EM00392C, 2016a.
- Kumar, M., Tiwari, S., Murari, V., Singh, A. K., and Banerjee, T.: Wintertime characteristics of aerosols at middle Indo-Gangetic Plain: Impacts of regional meteorology and long range transport, *Atmos. Environ.*, 104, 162-175, 10.1016/j.atmosenv.2015.01.014, 2015.
- Kumar, V., Sarkar, C., and Sinha, V.: Influence of post harvest crop residue fires on surface ozone mixing ratios in the NW IGP analyzed using two years of continuous in-situ trace gas measurements, *J. Geophys. Res. Atmos.*, 121, 3619–3633, doi: 10.1002/2015JD024308, 2016b.
- Lawrence, M. G., and Lelieveld, J.: Atmospheric pollutant outflow from southern Asia: a review, *Atmos. Chem. Phys.*, 10, 11017-11096, doi: 10.5194/acp-10-11017-2010, 2010.
- Lüthi, Z. L., Škerlak, B., Kim, S. W., Lauer, A., Mues, A., Rupakheti, M., and Kang, S.: Atmospheric brown clouds reach the Tibetan Plateau by crossing the Himalayas, *Atmos. Chem. Phys.*, 15, 6007-6021, doi: 10.5194/acp-15-6007-2015, 2015.
- Marinoni, A., Cristofanelli, P., Laj, P., Duchi, R., Putero, D., Calzolari, F., Landi, T. C., Vuillermoz, E., Maione, M., and Bonasoni, P.: High black carbon and ozone concentrations during pollution transport in the Himalayas: Five years of continuous observations at NCO-P global GAW station, *J. Environ. Sci.-China*, 25, 1618-1625, doi: 10.1016/s1001-0742(12)60242-3, 2013.
- Misra, A., Gaur, A., Bhattu, D., Ghosh, S., Dwivedi, A. K., Dalai, R., Paul, D., Gupta, T., Tare, V., Mishra, S. K., Singh, S., and Tripathi, S. N.: An overview of the physico-chemical characteristics of dust at Kanpur in the central Indo-Gangetic basin, *Atmospheric Environment*, 97, 386-396, <http://dx.doi.org/10.1016/j.atmosenv.2014.08.043>, 2014.
- Mohnen, V. A., Goldstein, W., and Wang, W. C.: Tropospheric Ozone and Climate Change, *Air & Waste*, 43, 1332-1334, doi: 10.1080/1073161x.1993.10467207, 1993.
- Naja, M., Lal, S., and Chand, D.: Diurnal and seasonal variabilities in surface ozone at a high altitude site Mt Abu (24.6° N, 72.7° E, 1680m asl) in India, *Atmos. Environ.*, 37, 4205-4215, doi: 10.1016/S1352-2310(03)00565-X, 2003.
- Naja, M., Mallik, C., Sarangi, T., Sheel, V., and Lal, S.: SO<sub>2</sub> measurements at a high altitude site in the central Himalayas: Role of regional transport, *Atmos. Environ.*, 99, 392-402, doi: 10.1016/j.atmosenv.2014.08.031, 2014.
- Pan, X. L., Kanaya, Y., Wang, Z. F., Liu, Y., Pochanart, P., Akimoto, H., Sun, Y. L., Dong, H. B., Li, J., Irie, H., and Takigawa, M.: Correlation of black carbon aerosol and carbon monoxide in the high-altitude environment of Mt. Huang in Eastern China, *Atmos. Chem. Phys.*, 11, 9735-9747, doi: 10.5194/acp-11-9735-2011, 2011.
- Panday, A. K., and Prinn, R. G.: Diurnal cycle of air pollution in the Kathmandu Valley, Nepal: Observations, *J. Geophys. Res.*, 114, D09305, doi: 10.1029/2008jd009777, 2009.
- Pathak, B., Bhuyan, P. K., Biswas, J., and Takemura, T.: Long term climatology of particulate matter and associated microphysical and optical properties over Dibrugarh, North-East India and inter-comparison with SPRINTARS simulations, *Atmospheric Environment*, 69, 334-344, <http://dx.doi.org/10.1016/j.atmosenv.2012.12.032>, 2013.
- Patil, M., Patil, S., Waghmare, R., and Dharmaraj, T.: Planetary Boundary Layer and aerosol interactions over the Indian sub-continent, *J. Atmos. Sol.-Terr. Phys.*, 112, 38-42, doi: 10.1016/j.jastp.2014.02.007, 2014.
- Praveen, P. S., Ahmed, T., Kar, A., Rehman, I. H., and Ramanathan, V.: Link between local scale BC emissions in the Indo-Gangetic Plains and large scale atmospheric solar absorption, *Atmos. Chem. Phys.*, 12, 1173-1187, doi: 10.5194/acp-12-1173-2012, 2012.
- Putero, D., Landi, T., Cristofanelli, P., Marinoni, A., Laj, P., Duchi, R., Calzolari, F., Verza, G., and Bonasoni, P.: Influence of open vegetation fires on black carbon and ozone variability in the southern Himalayas (NCO-P, 5079 m asl), *Environ. Pollut.*, 184, 597-604, doi: 10.1016/j.envpol.2013.09.035, 2014.

- Putero, D., Cristofanelli, P., Marinoni, A., Adhikary, B., Duchi, R., Shrestha, S. D., Verza, G. P., Landi, T. C., Calzolari, F., Busetto, M., Agrillo, G., Biancofiore, F., Di Carlo, P., Panday, A. K., Rupakheti, M., and Bonasoni, P.: Seasonal variation of ozone and black carbon observed at Paknajol, an urban site in the Kathmandu Valley, Nepal, *Atmos. Chem. Phys. Discuss.*, 15, 22527-22566, 10.5194/acpd-15-22527-2015, 2015a.
- ~~Putero, D., Cristofanelli, P., Marinoni, A., Adhikary, B., Duchi, R., Shrestha, S. D., Verza, G. P., Landi, T. C., Calzolari, F., Busetto, M., Agrillo, G., Biancofiore, F., Di Carlo, P., Panday, A. K., Rupakheti, M., and Bonasoni, P.: Seasonal variation of ozone and black carbon observed at Paknajol, an urban site in the Kathmandu Valley, Nepal, *Atmos. Chem. Phys.*, 15, 13957-13971, doi: 10.5194/acp-15-13957-2015, 2015b.~~
- Ram, K., Sarin, M., and Tripathi, S.: A 1 year record of carbonaceous aerosols from an urban site in the Indo-Gangetic Plain: Characterization, sources, and temporal variability, *J. Geophys. Res.*, 115, D24313, doi: 10.1029/2010JD014188, 2010.
- ~~Ram, K., and Sarin, M. M.: Day night variability of EC, OC, WSOC and inorganic ions in urban environment of Indo-Gangetic Plain: Implications to secondary aerosol formation, *Atmos. Environ.*, 45, 460-468, doi: 10.1016/j.atmosenv.2010.09.055, 2011.~~
- Ramachandran, S., and Rajesh, T. A.: Black carbon aerosol mass concentrations over Ahmedabad, an urban location in western India: Comparison with urban sites in Asia, Europe, Canada, and the United States, *Journal of Geophysical Research: Atmospheres*, 112, n/a-n/a, 10.1029/2006JD007488, 2007.
- Ramanathan, V., Li, F., Ramana, M., Praveen, P., Kim, D., Corrigan, C., Nguyen, H., Stone, E. A., Schauer, J. J., and Carmichael, G.: Atmospheric brown clouds: Hemispherical and regional variations in long-range transport, absorption, and radiative forcing, *J. Geophys. Res.*, 112, D22S21, doi: 10.1029/2006JD008124, 2007.
- Ramanathan, V., and Carmichael, G.: Global and regional climate changes due to black carbon, *Nat. Geosci.*, 1, 221-227, 2008.
- Rastogi, N., Singh, A., Sarin, M. M., and Singh, D.: Temporal variability of primary and secondary aerosols over northern India: Impact of biomass burning emissions, *Atmos. Environ.*, 125, 396-403, doi: 10.1016/j.atmosenv.2015.06.010, 2016.
- Rehman, I. H., Ahmed, T., Praveen, P. S., Kar, A., and Ramanathan, V.: Black carbon emissions from biomass and fossil fuels in rural India, *Atmospheric Chemistry and Physics*, 11, 7289-7299, 10.5194/acp-11-7289-2011, 2011.
- Safai, P. D., Kewat, S., Pandithurai, G., Praveen, P. S., Ali, K., Tiwari, S., Rao, P. S. P., Budhawant, K. B., Saha, S. K., and Devara, P. C. S.: Aerosol characteristics during winter fog at Agra, North India, *J. Atmos. Chem.*, 61, 101-118, doi: 10.1007/s10874-009-9127-4, 2009.
- Sandradewi, J., Prévôt, A. S. H., Szidat, S., Perron, N., Alfarra, M. R., Lanz, V. A., Weingartner, E., and Baltensperger, U.: Using Aerosol Light Absorption Measurements for the Quantitative Determination of Wood Burning and Traffic Emission Contributions to Particulate Matter, *Environ. Sci. Technol.*, 42, 3316-3323, doi: 10.1021/es702253m, 2008.
- Sarkar, C., Kumar, V., and Sinha, V.: Massive emissions of carcinogenic benzenoids from paddy residue burning in north India, *Curr. Sci. India*, 104, 1703-1709, 2013.
- Schmid, O., Artaxo, P., Arnott, W. P., Chand, D., Gatti, L. V., Frank, G. P., Hoffer, A., Schnaiter, M., and Andreae, M. O.: Spectral light absorption by ambient aerosols influenced by biomass burning in the Amazon Basin. I: Comparison and field calibration of absorption measurement techniques, *Atmos. Chem. Phys.*, 6, 3443-3462, doi: 10.5194/acp-6-3443-2006, 2006.
- Sharma, R. K., Bhattarai, B. K., Sapkota, B. K., Gewali, M. B., and Kjeldstad, B.: Black carbon aerosols variation in Kathmandu valley, Nepal, *Atmos. Environ.*, 63, 282-288, doi: 10.1016/j.atmosenv.2012.09.023, 2012.
- Sharma, S., Brook, J. R., Cachier, H., Chow, J., Gaudenzi, A., and Lu, G.: Light absorption and thermal measurements of black carbon in different regions of Canada, *Journal of Geophysical Research: Atmospheres*, 107, AAC 11-11-AAC 11-11, 10.1029/2002JD002496, 2002.

- Shindell, D.: Integrated Assessment of Black Carbon and Tropospheric Ozone: Summary for Decision Makers, United Nations Environment Programme, 2011.
- Sinha, V., Kumar, V., and Sarkar, C.: Chemical composition of pre-monsoon air in the Indo-Gangetic Plain measured using a new air quality facility and PTR-MS: high surface ozone and strong influence of biomass burning, *Atmos. Chem. Phys.*, 14, 5921-5941, doi: 10.5194/acp-14-5921-2014, 2014.
- Skamarock, W., Klemp, J., Dudhia, J., Gill, D., and Barker, D.: A description of the Advanced Research WRF version 3, Technical Report NCAR/TN475+STR, National Center for Atmospheric Research Technical Note, Boulder, Colorado, 2008.
- Snider, G., Weagle, C. L., Murdymootoo, K. K., Ring, A., Ritchie, Y., Stone, E., Walsh, A., Akoshile, C., Anh, N. X., Balasubramanian, R., Brook, J., Qonitan, F. D., Dong, J., Griffith, D., He, K., Holben, B. N., Kahn, R., Lagrosas, N., Lestari, P., Ma, Z., Misra, A., Norford, L. K., Quel, E. J., Salam, A., Schichtel, B., Segev, L., Tripathi, S., Wang, C., Yu, C., Zhang, Q., Zhang, Y., Brauer, M., Cohen, A., Gibson, M. D., Liu, Y., Martins, J. V., Rudich, Y., and Martin, R. V.: Variation in global chemical composition of PM<sub>2.5</sub>: emerging results from SPARTAN, *Atmos. Chem. Phys.*, 16, 9629-9653, 10.5194/acp-16-9629-2016, 2016.
- Srivastava, A. K., Tiwari, S., Devara, P. C. S., Bisht, D. S., Srivastava, M. K., Tripathi, S. N., Goloub, P., and Holben, B. N.: Pre-monsoon aerosol characteristics over the Indo-Gangetic Basin: implications to climatic impact, *Ann. Geophys.*, 29, 789-804, doi: 10.5194/angeo-29-789-2011, 2011.
- Stevenson, D., Dentener, F., Schultz, M., Ellingsen, K., Van Noije, T., Wild, O., Zeng, G., Amann, M., Atherton, C., and Bell, N.: Multimodel ensemble simulations of present-day and near-future tropospheric ozone, *J. Geophys. Res.*, 111, D08301, doi: 10.1029/2005JD006338, 2006.
- Tiwari, S., Srivastava, A. K., Bisht, D. S., Parmita, P., Srivastava, M. K., and Attri, S. D.: Diurnal and seasonal variations of black carbon and PM<sub>2.5</sub> over New Delhi, India: Influence of meteorology, *Atmospheric Research*, 125-126, 50-62, 10.1016/j.atmosres.2013.01.011, 2013.
- Tiwari, S., Pipal, A. S., Hopke, P. K., Bisht, D. S., Srivastava, A. K., Tiwari, S., Saxena, P. N., Khan, A. H., and Pervez, S.: Study of the carbonaceous aerosol and morphological analysis of fine particles along with their mixing state in Delhi, India: a case study, *Environmental science and pollution research international*, 10.1007/s11356-015-4272-6, 2015.
- Tiwari, S., Dumka, U. C., Kaskaoutis, D. G., Ram, K., Panicker, A. S., Srivastava, M. K., Tiwari, S., Attri, S. D., Soni, V. K., and Pandey, A. K.: Aerosol chemical characterization and role of carbonaceous aerosol on radiative effect over Varanasi in central Indo-Gangetic Plain, *Atmospheric Environment*, 125, Part B, 437-449, <http://dx.doi.org/10.1016/j.atmosenv.2015.07.031>, 2016.
- Tiwari, S., Dumka, U. C., Gautam, A. S., Kaskaoutis, D. G., Srivastava, A. K., Bisht, D. S., Chakrabarty, R. K., Sumlin, B. J., and Solmon, F.: Assessment of PM<sub>2.5</sub> and PM<sub>10</sub> over Guwahati in Brahmaputra River Valley: Temporal evolution, source apportionment and meteorological dependence, *Atmospheric Pollution Research*, 8, 13-28, <http://dx.doi.org/10.1016/j.apr.2016.07.008>, 2017.
- Trivedi, D. K., Ali, K., and Beig, G.: Impact of meteorological parameters on the development of fine and coarse particles over Delhi, *Science of The Total Environment*, 478, 175-183, <http://dx.doi.org/10.1016/j.scitotenv.2014.01.101>, 2014.
- Verma, R. L., Sahu, L. K., Kondo, Y., Takegawa, N., Han, S., Jung, J. S., Kim, Y. J., Fan, S., Sugimoto, N., Shammaa, M. H., Zhang, Y. H., and Zhao, Y.: Temporal variations of black carbon in Guangzhou, China, in summer 2006, *Atmos. Chem. Phys.*, 10, 6471-6485, doi: 10.5194/acp-10-6471-2010, 2010.
- WHO: Air quality guidelines: global update 2005: particulate matter, ozone, nitrogen dioxide, and sulfur dioxide, World Health Organization, 2006.
- Wiedinmyer, C., Akagi, S. K., Yokelson, R. J., Emmons, L. K., Al-Saadi, J. A., Orlando, J. J., and Soja, A. J.: The Fire INventory from NCAR (FINN): a high resolution global model to estimate the emissions from open burning, *Geosci. Model Dev.*, 4, 625-641, doi: 10.5194/gmd-4-625-2011, 2011.
- Zhou, X., Gao, J., Wang, T., Wu, W., and Wang, W.: Measurement of black carbon aerosols near two Chinese megacities and the implications for improving emission inventories, *Atmospheric Environment*, 43, 3918-3924, 10.1016/j.atmosenv.2009.04.062, 2009.

1059 **Table 1.** Summary of instruments deployed during monitoring in Lumbini

| Instrument<br>(Model)                      | Manufacturer                      | Parameters                                                                   | Inlet/sensor height<br>(above ground) | Sampling<br>interval | Sampled period |
|--------------------------------------------|-----------------------------------|------------------------------------------------------------------------------|---------------------------------------|----------------------|----------------|
| Environmental<br>Dust monitor<br>(EDM 164) | GRIMM Aerosol Technik,<br>Germany | PM <sub>1</sub> , PM <sub>2.5</sub> , PM <sub>10</sub>                       | 5 m                                   | 5 min                | 01/04-15/06    |
| Aethalometer<br>(AE42)                     | Magee Scientific, USA             | Aerosol light<br>absorption at seven<br>wavelengths, and BC<br>concentration | 3 m                                   | 5 min                | 01/04-05/06    |
| CO analyzer<br>(48i)                       | Thermo Scientific, USA            | CO concentration                                                             | 3 m                                   | 1 min                | 01/04-15/06    |
| O <sub>3</sub> analyzer (49i)              | Thermo Scientific, USA            | O <sub>3</sub> concentration                                                 | 3 m                                   | 1 min                | 01/04-15/06    |
| Automatic<br>Weather Station<br>(AWS)      | Campbell Scientific, UK           | T, RH, WS, WD,<br>Global Radiation,<br>Precipitation                         | 12 m                                  | 1 min                | 01/04-15/06    |

1060

1061

1062 **Table 2.** Comparison of PM<sub>2.5</sub>, BC, CO and O<sub>3</sub> concentrations at Lumbini with those at other sites in South Asia

| Sites              | Characteristics | Measurement period             | PM <sub>2.5</sub> (µg m <sup>-3</sup> ) | BC (µg/m <sup>3</sup> ) | CO (ppbv)   | O <sub>3</sub> (ppbv) | References                                    |
|--------------------|-----------------|--------------------------------|-----------------------------------------|-------------------------|-------------|-----------------------|-----------------------------------------------|
| Lumbini, Nepal     | Semi-urban      | Pre-monsoon, 2013              | 53.1±35.1                               | 4.9±3.8                 | 344.1±160.3 | 46.6±20.3             | This study                                    |
| Kathmandu, Nepal   | Urban           | Pre-monsoon, 2013              | -                                       | 14.5±10                 | -           | 38.0±25.6             | (Putero et al., 2015b)                        |
| Mt. Everest, Nepal | Remote          | Pre-monsoon                    | -                                       | 0.4±0.4                 | -           | 61.3±7.7              | (Marinoni et al., 2013)                       |
| Delhi, India       | Urban           | Pre-monsoon (night-time)       | 82.3±50.5                               | 7.70±7.25               | 1800±890    | -                     | (Bisht et al., 2015)                          |
| Kanpur, India      | Urban           | June 2009-May 2013, April-June | -                                       | 2.1±0.9                 | 721±403     | 27.9±17.8             | (Gaur et al., 2014)<br>(Ram et al., 2010)     |
| Mohali, India      | Semi-urban      | May, 2012                      | 104±80.3                                | -                       | 566.7±239.2 | 57.8±25.4             | (Sinha et al., 2014)                          |
| Mt. Abu, India     | Remote          | Jan 1993-Dec 2000, pre-monsoon | -                                       | 0.7±0.14                | 131±36      | 39.9±10.8             | (Naja et al., 2003) (Das and Jayaraman, 2011) |

**Table 3.** Inter-comparison of observed and model simulated hourly average concentrations of air pollutants during the measurement campaign period. Unit: BC and PM in  $\mu\text{g}/\text{m}^3$  and CO in ppbv.

| Pollutants            | Observed (mean and range) | Modeled (mean and range) | Ratio of mean (observed/modeled) |
|-----------------------|---------------------------|--------------------------|----------------------------------|
| BC                    | 4.9 (0.3-29.9)            | 1.8 (0.4-3.7)            | 2.7                              |
| <b>PM<sub>1</sub></b> | <b>36.6 (3.6-197.6)</b>   | <b>12.3 (0.9-41.7)</b>   | <b>3</b>                         |
| PM <sub>2.5</sub>     | 53.1 (6.1-272.2)          | 17.3 (1.9-48.3)          | 3                                |
| PM <sub>10</sub>      | 128.8 (10.5-604.0)        | 25.4 (2.1-68.8)          | 5                                |
| CO                    | 344.1(124.9-1429.7)       | 255.7 (72.2-613.1)       | 1.4                              |

**Figures**

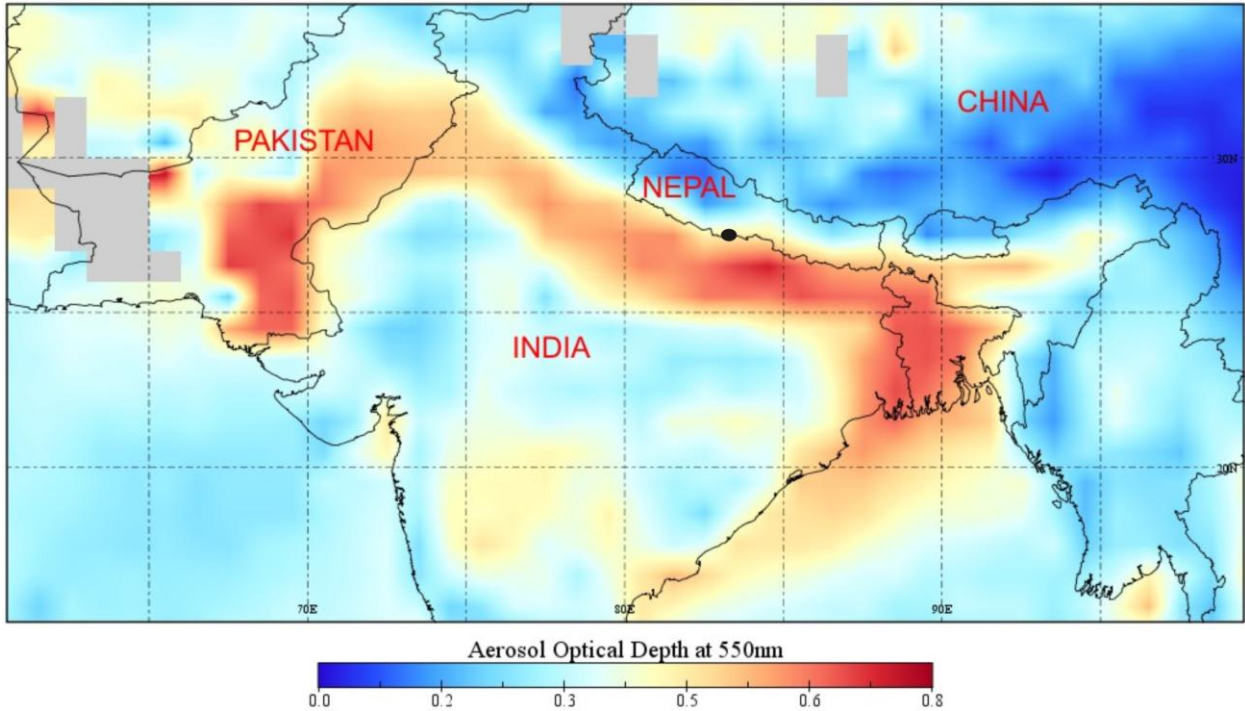

**Figure 1.** Aerosol optical depth in South Asia acquired with the MODIS instrument aboard TERRA satellite averaged over the winter and pre-monsoon season (December 2012-June 2013). High aerosol loading can be seen over the entire Indo-Gangetic Plains (IGP). An aerosol hotspot south of Lumbini (small black mark nearby the border of Nepal with India) is clearly visible. Light grey color used in the figure represents the absence of data.

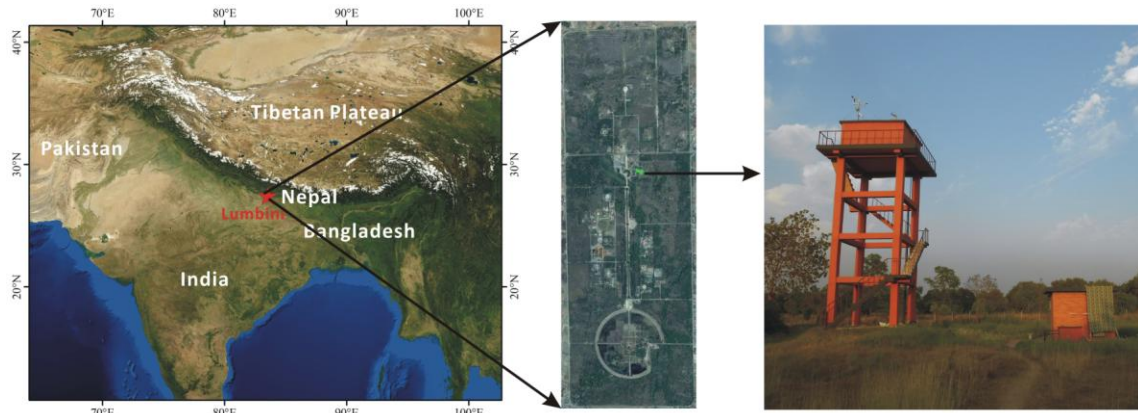

**Figure 2.** Location of sampling site in Lumbini in southern Nepal (left panel). The middle panel shows the Kenzo Tange Master Plan Area of Lumbini while the right panel shows the sampling tower in the Lumbini Master Plan Area.

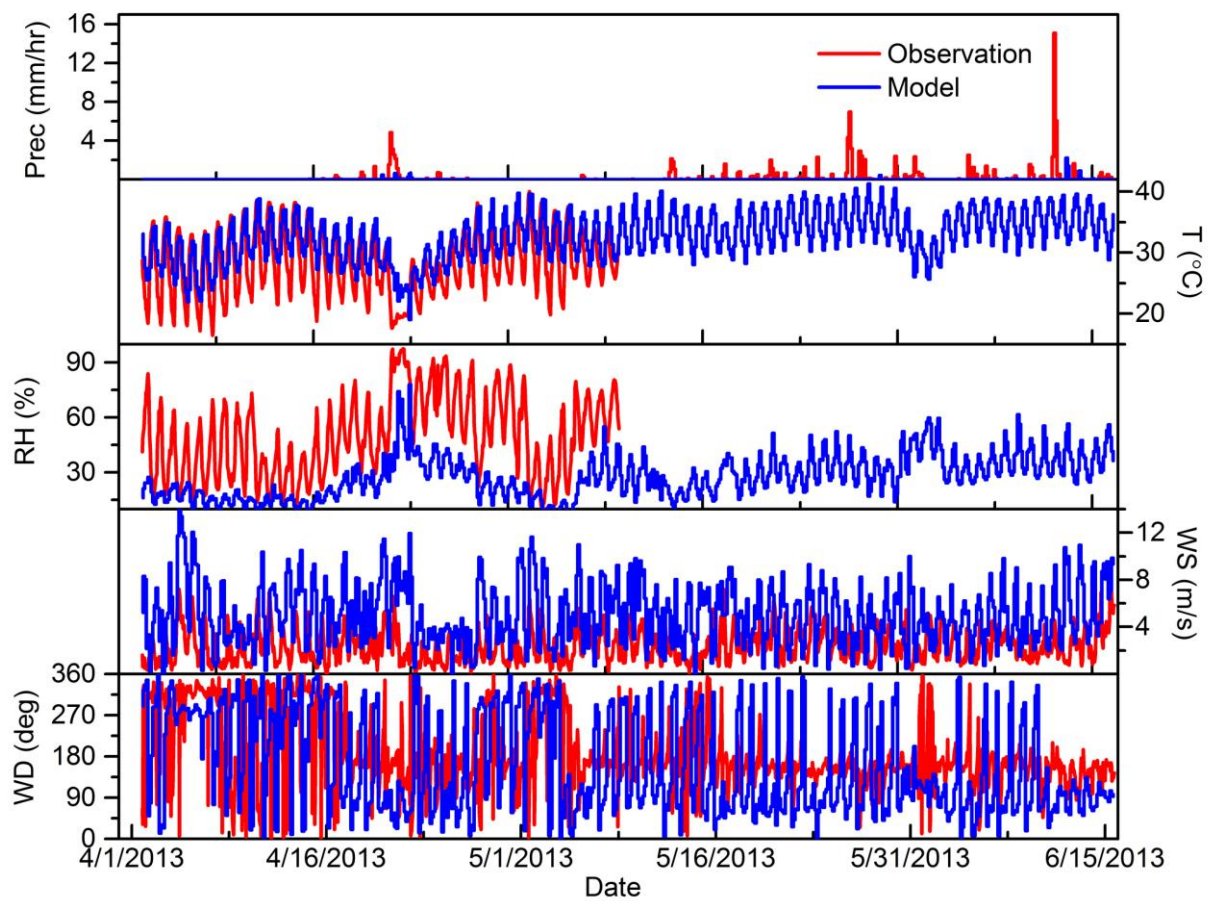

**Figure 3.** Time series of hourly average observed (red line) and model estimated (blue line) meteorological parameters at Lumbini, Nepal for the entire sampling period from 1 April to 15 June 2013.

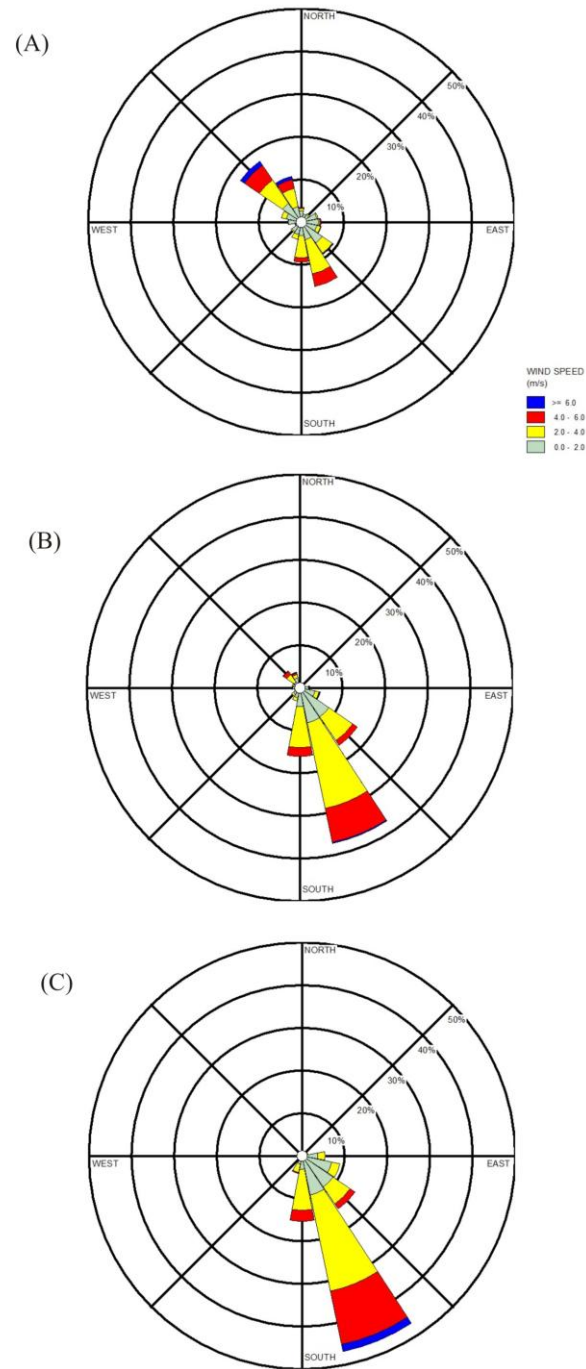

**Figure 4.** Wind rose of wind speed and wind direction observed at Lumbini during the month of (A) April, (B) May, and (C) (1<sup>st</sup>-15<sup>th</sup>) June 2013.

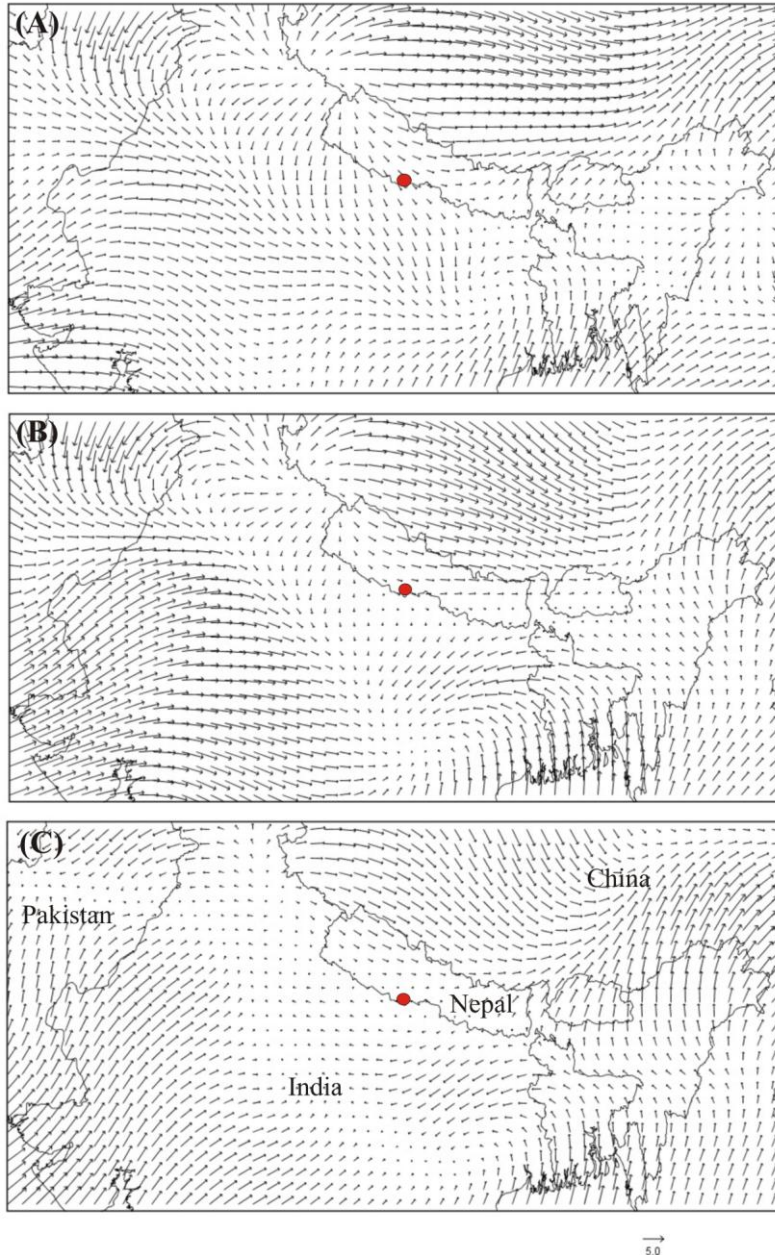

**Figure 5.** Monthly synoptic surface winds for the month of (A) April, (B) May and (C) June 2013, based on NCEP/NCAR reanalysis data. Orientations of arrows in the figures refer to wind direction whereas the length of arrows represents the magnitude of wind speed (m/s). Red dot in the map represents the location of Lumbini.

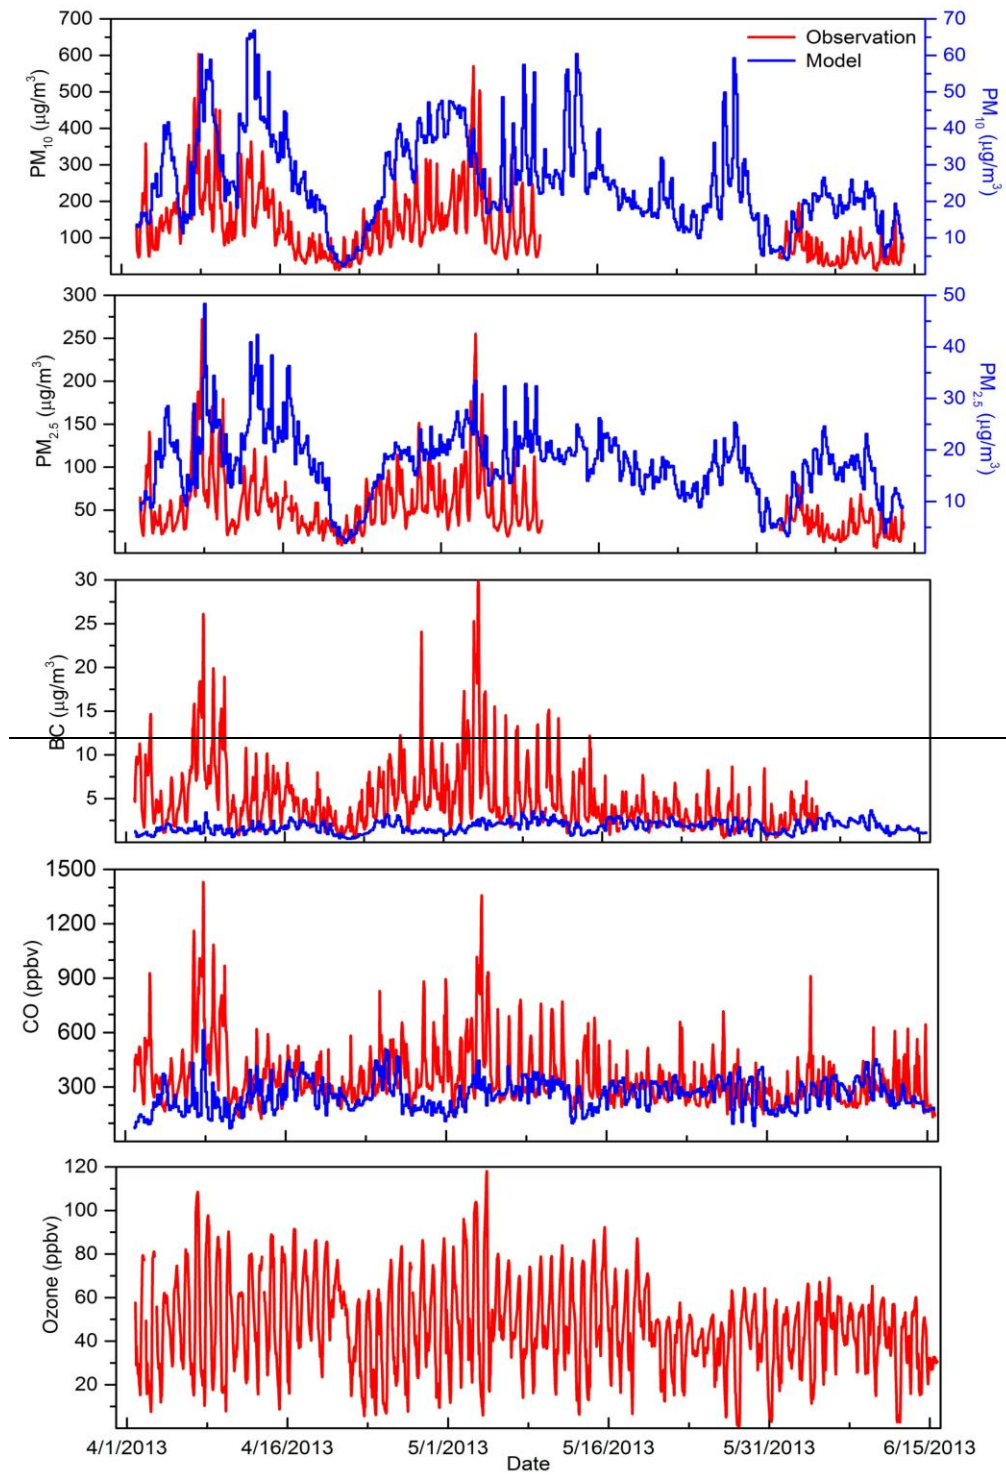

1094

1095

1096

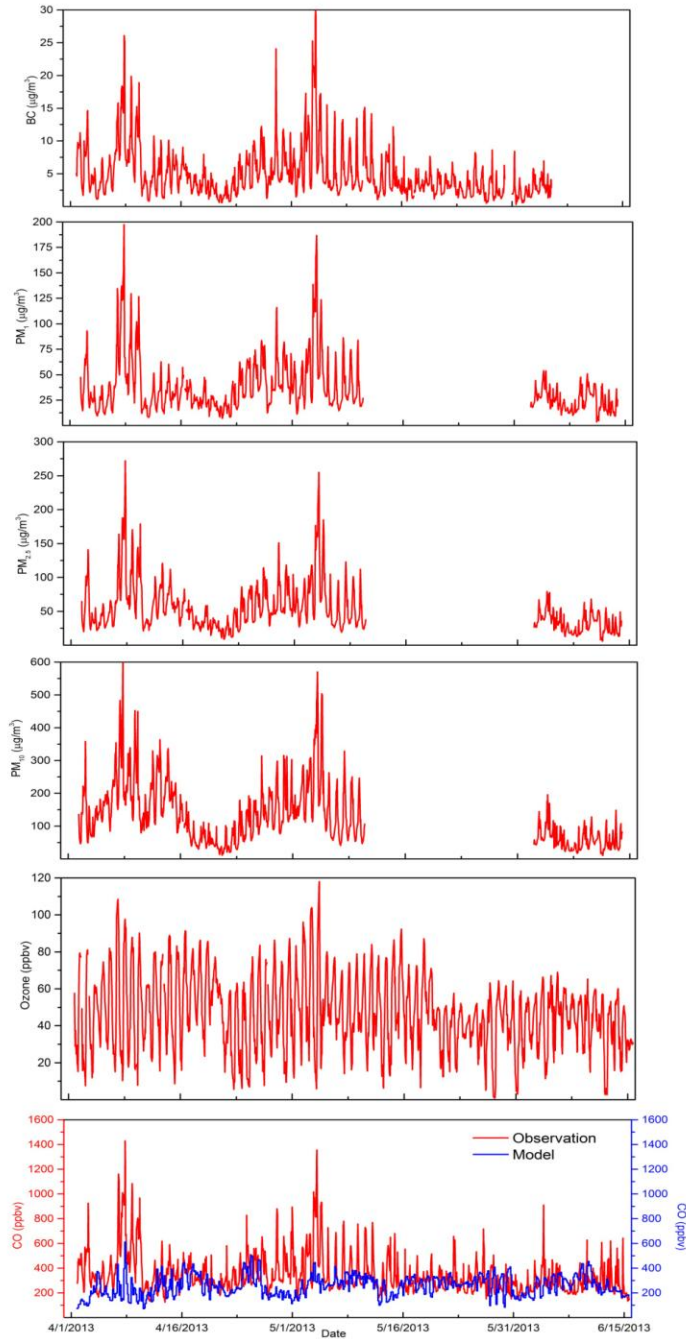

**Figure 6.** Time series of the observed (red line) and model estimated (blue line) hourly average concentrations of BC, PM<sub>1</sub>, PM<sub>2.5</sub>, PM<sub>10</sub>, O<sub>3</sub> and CO at Lumbini, Nepal for the entire sampling period from 1 April to 15 June 2013.

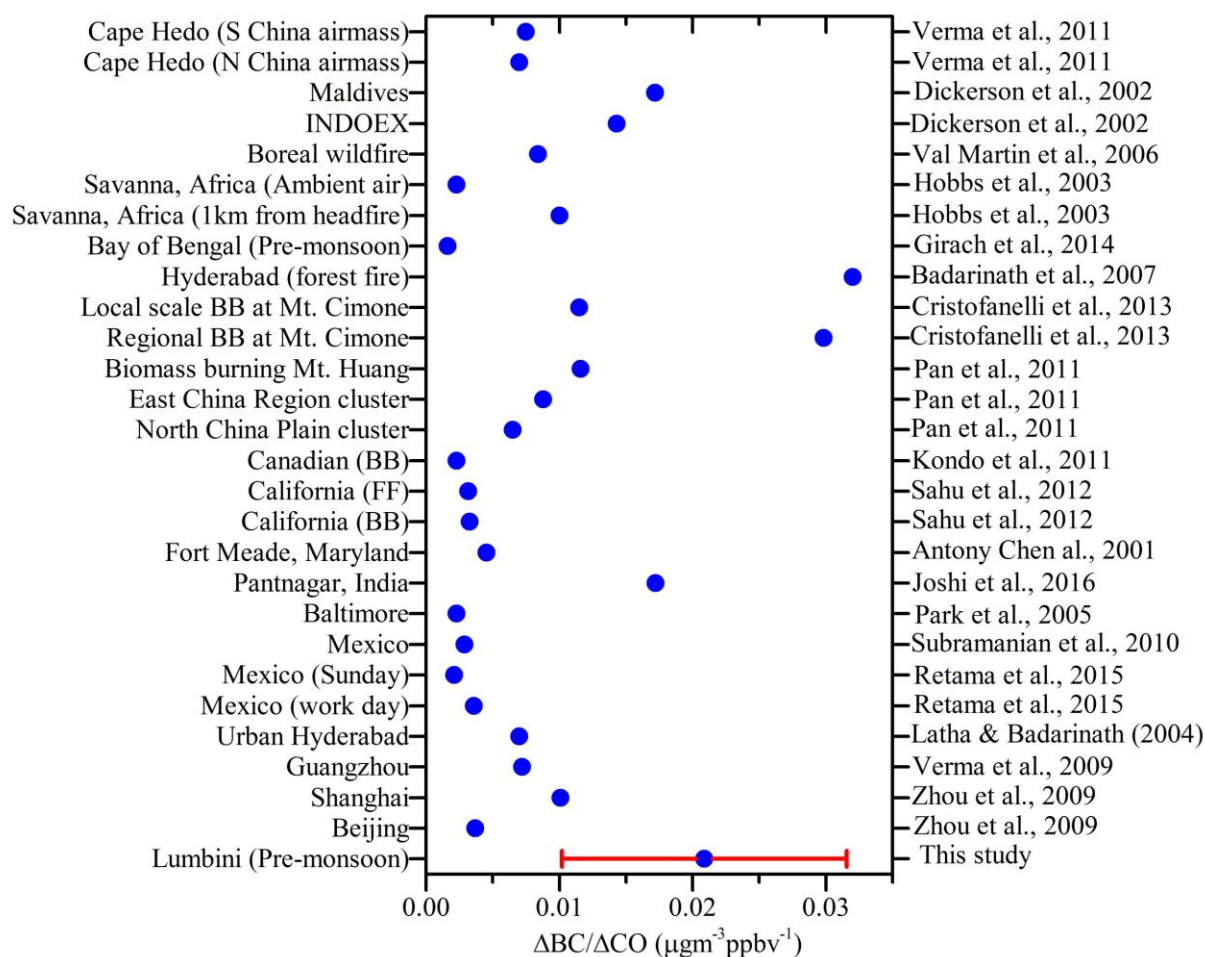

Figure 7: Comparison of BC concentrations to CO concentrations ( $\Delta BC/\Delta CO$ ) ratios obtained for Lumbini with other sites. The red horizontal bar represents standard deviation.

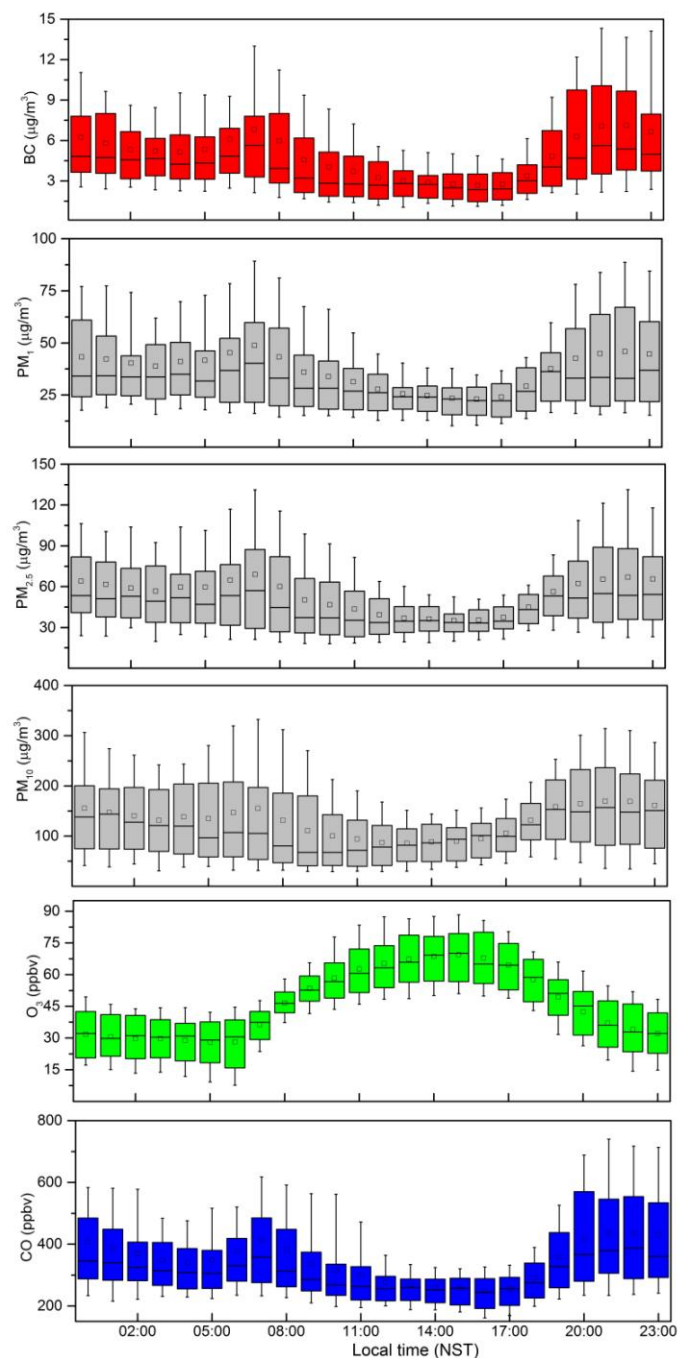

**Figure 8.** Diurnal variations of hourly average ambient concentrations of  $\text{PM}_{10}$ ,  $\text{BC}$ ,  $\text{CO}$  and  $\text{O}_3$  at Lumbini during the monitoring period (1 April -15 June 2013). In each box, lower and upper boundary of the box represents 25<sup>th</sup> and 75<sup>th</sup> percentile respectively, top and bottom of the whisker represents 90<sup>th</sup> and 10<sup>th</sup> percentile respectively, the mid-line represents median, and the square mark represents the mean for each hour.

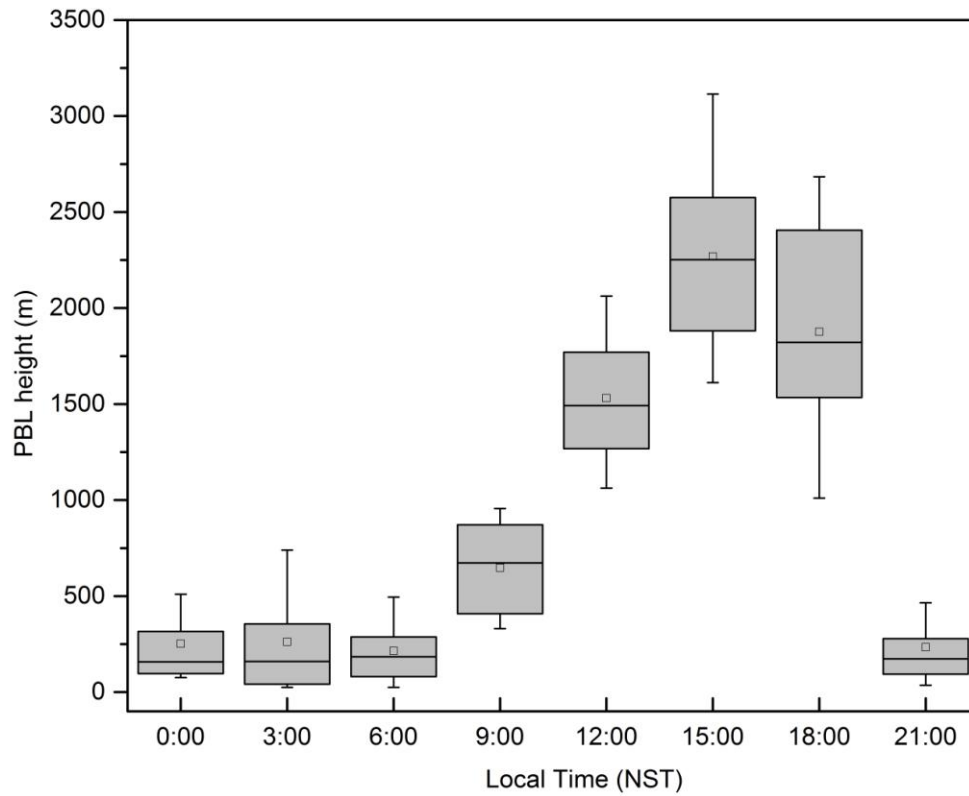

1112

1113 **Figure 9.** Diurnal variation of the planetary boundary layer (PBL) height at Lumbini obtained  
 1114 for every three hours of each day from the WRF-STEM model for the sampling period. The  
 1115 square mark in each box represents the mean PBL height, bottom and top of the box represents  
 1116 25<sup>th</sup> and 75<sup>th</sup> percentile, top and bottom of the whisker represents 90<sup>th</sup> and 10<sup>th</sup> percentile  
 1117 respectively.

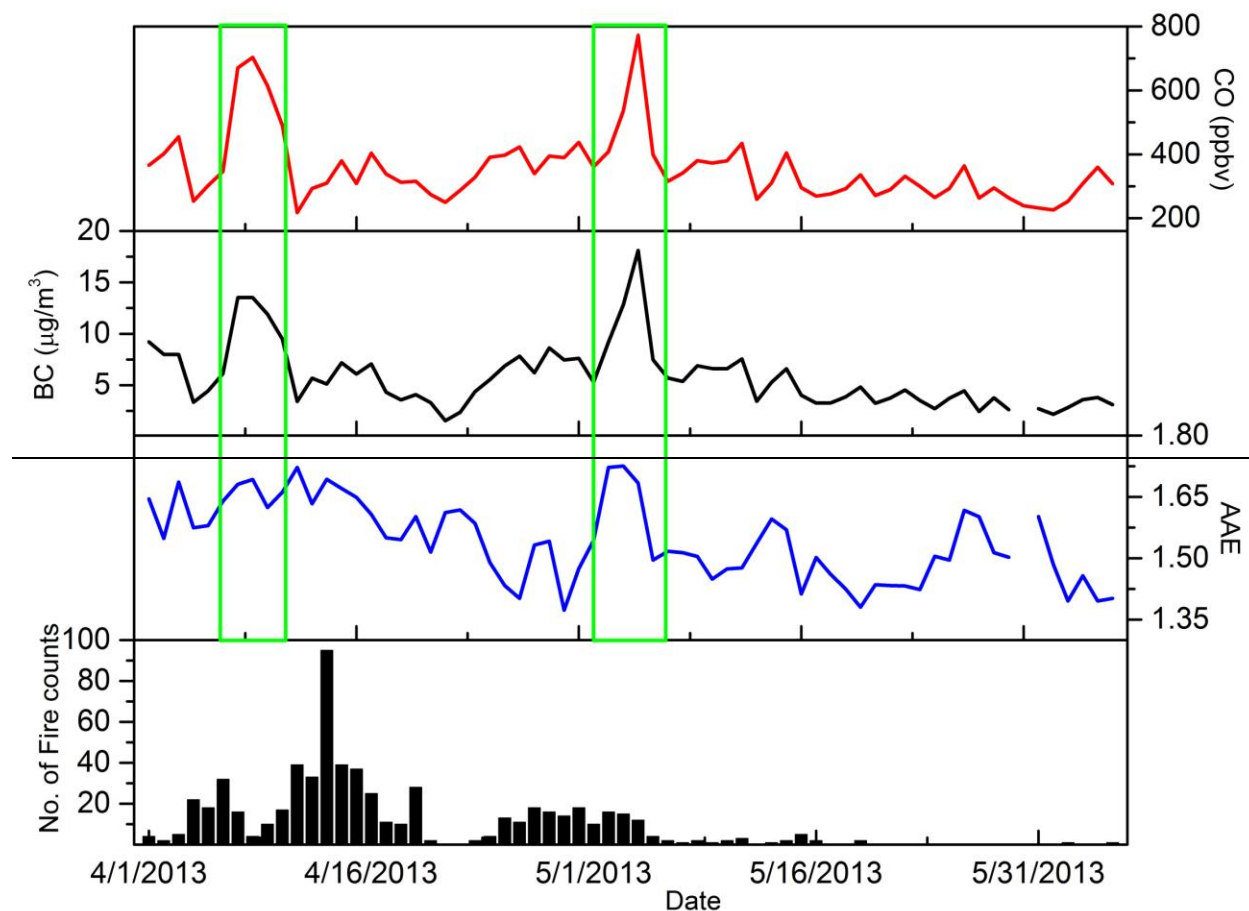

**Figure 9.** Time series of daily average CO, BC concentration, absorption Ångström exponent (AAE), along with fire counts acquired with the MODIS instrument onboard TERRA satellite for a 200x200 km grid centered at Lumbini. Two rectangular green boxes represent two episodes with high peaks in CO and BC concentrations.

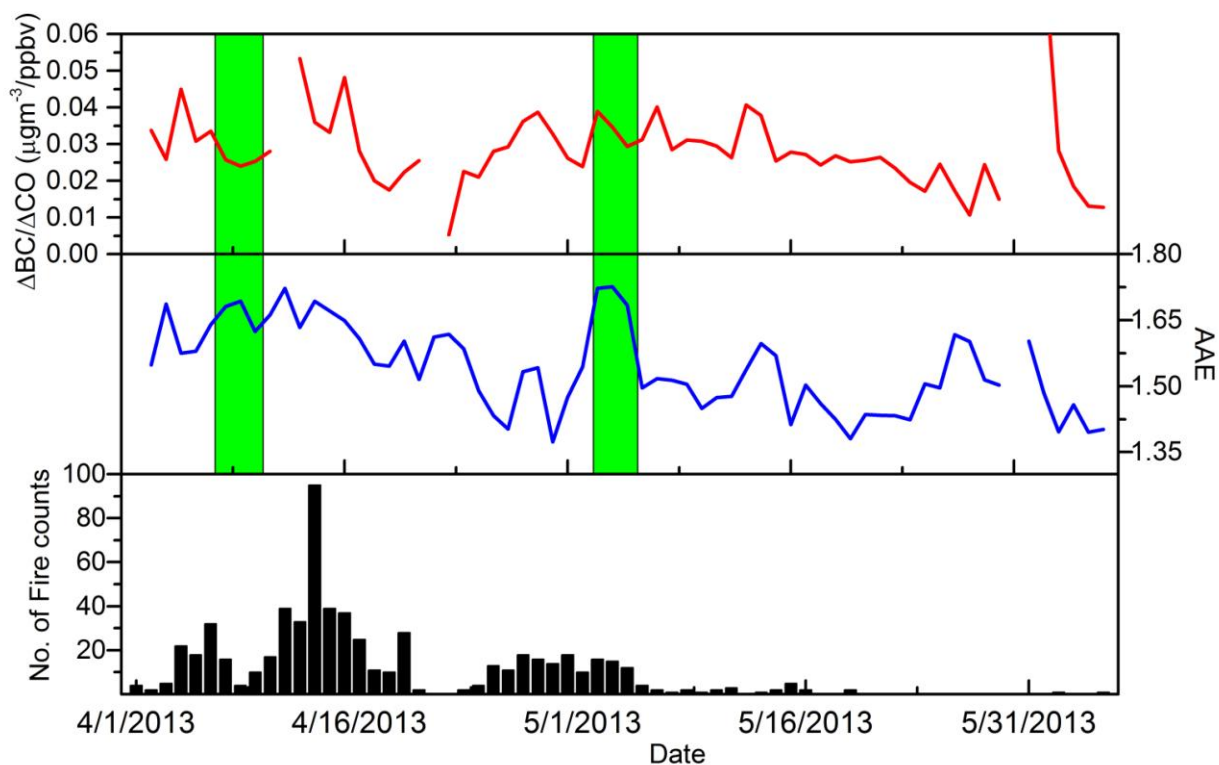

Figure 10. Time series of daily average  $\Delta BC/\Delta CO$  ratio, absorption Ångstrom exponent (AAE), along with fire counts acquired with the MODIS instrument onboard TERRA satellite for a 200×200 km grid centered at Lumbini. Two rectangular green boxes represent time of two episodes with high peaks in CO and BC concentrations as shown in earlier figures.

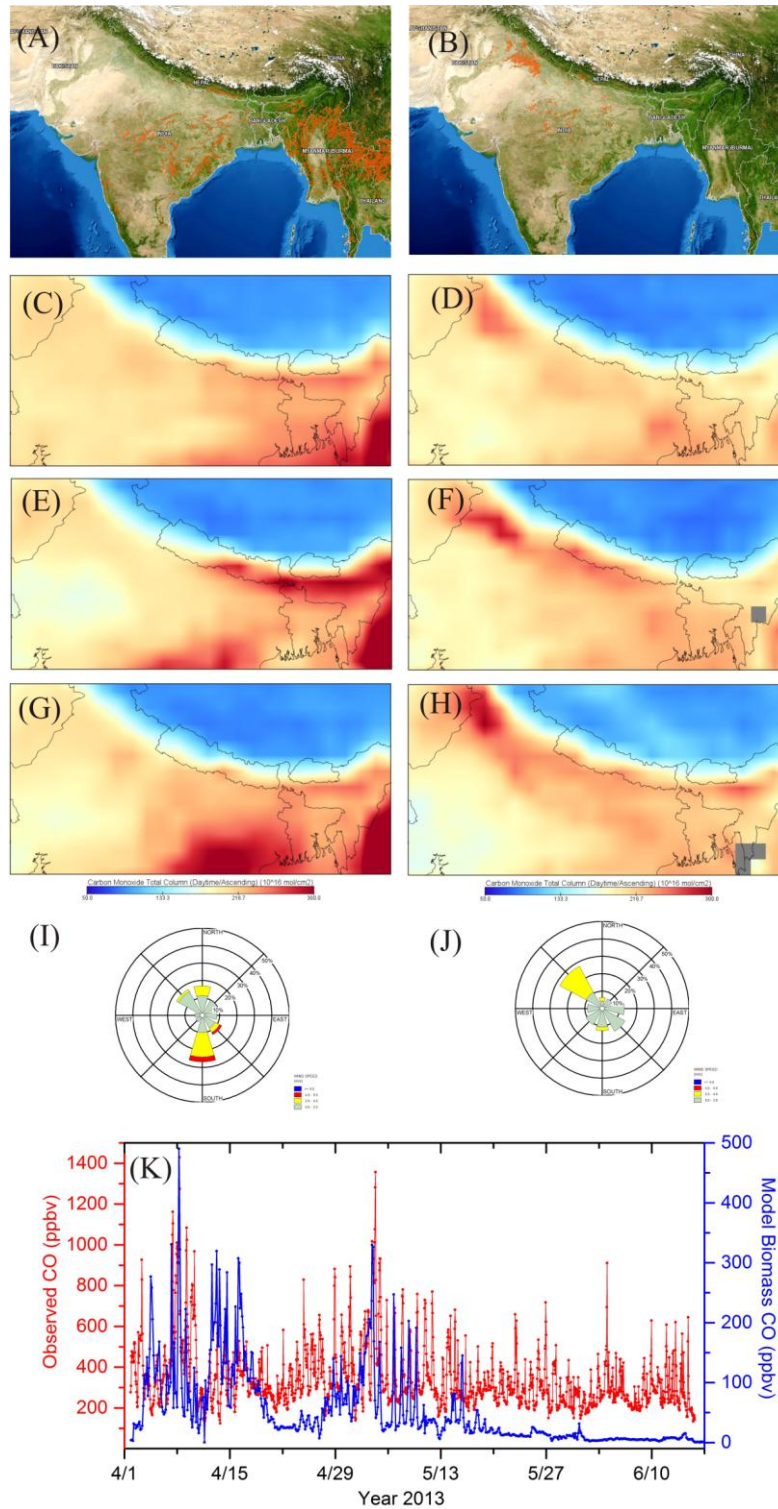

**Figure 11.** Active fire hotspots in the region acquired with the MODIS instrument on TERRA satellite during (A) Event-I (7-9 April) and (B) Event-II (3-4 May). CO emissions, acquired with AIRS satellite, in the region 2 days before (3-5 April), during (7-9 April) and 2 days after (10-12

1134 April) the Event-I are shown in panels (C), (E) and (G), respectively while panels (D), (F) and  
1135 (H) show CO emissions 2 days before (1-2 May), during (3-4 May) and 2 days after (5-6 May)  
1136 the Event-II. Panels (I) and (J) represent the average wind rose plot of observed wind direction  
1137 and wind speed during Event I and II, respectively. (K) Observed CO versus Model open  
1138 burning CO illustrating contribution of forest fires during peak CO loading.

1139

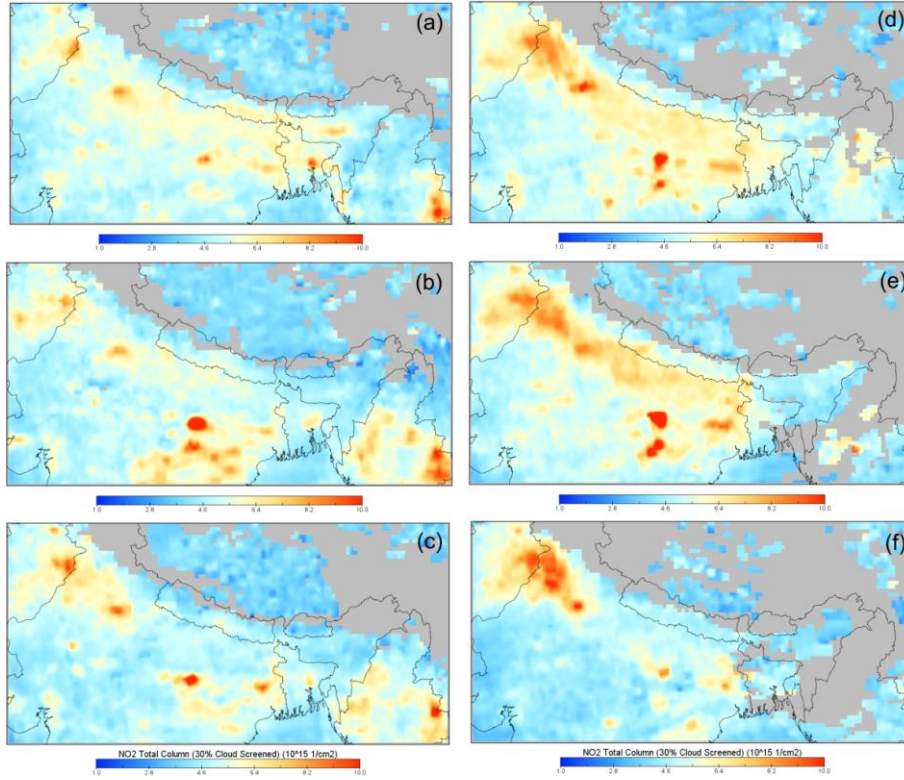

**Figure 12.** NO<sub>2</sub> total column obtained with OMI satellite over the region (a) before, (b) during, and (c) after the Event- I. The panels (d), (e), (f) show NO<sub>2</sub> total column before, during and after the Event- II.

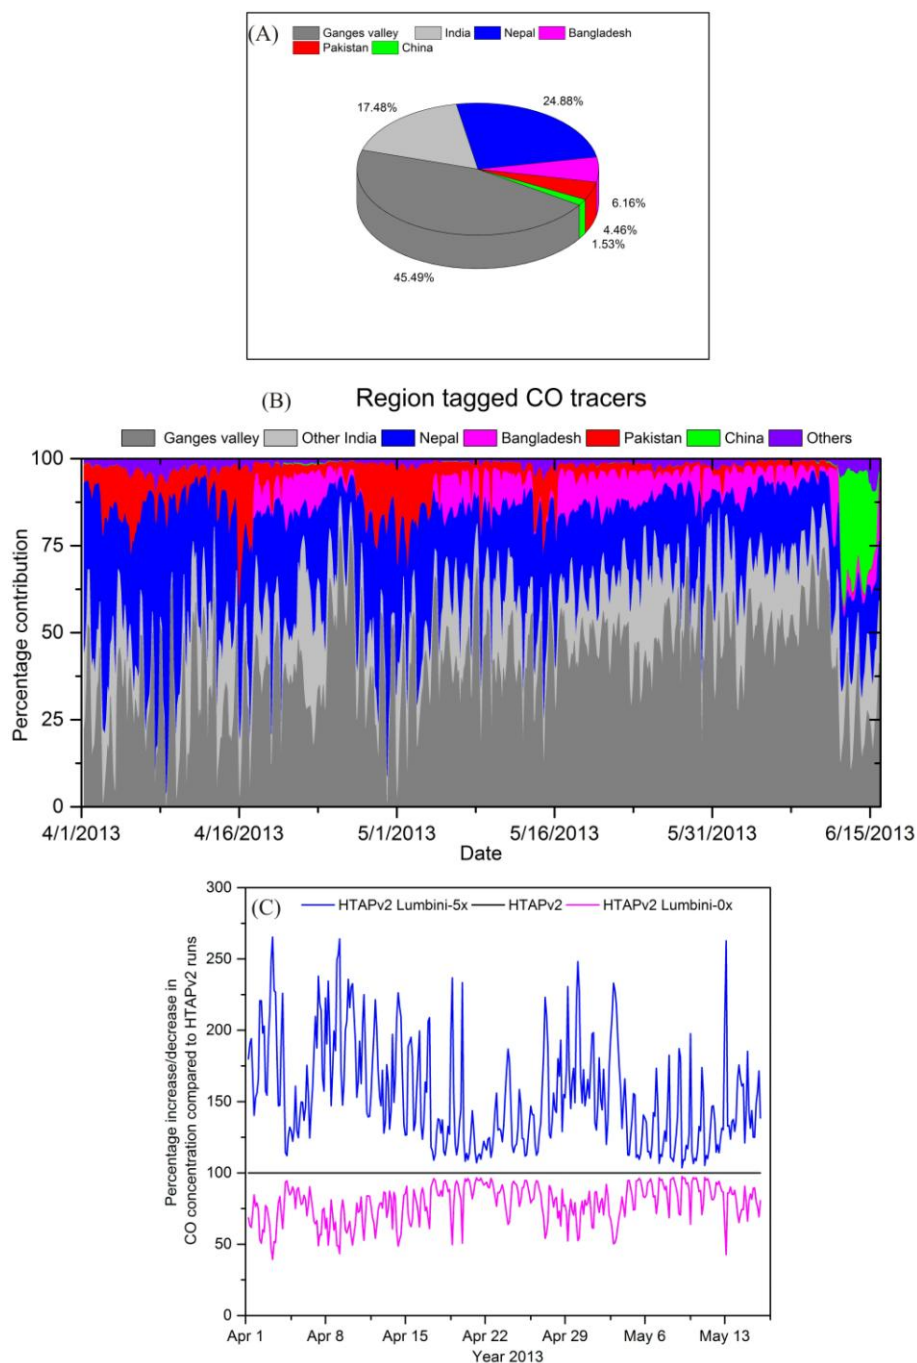

**Figure 13.** (A) WRF-STEM model estimated contributions of various source regions to average CO concentration in Lumbini for the sampling period, (B) time series of region tagged CO tracer during the whole measurement period using HTAP emission inventory and (C) Figure showing percentage increase/decrease in CO concentration with different emissions scenario.

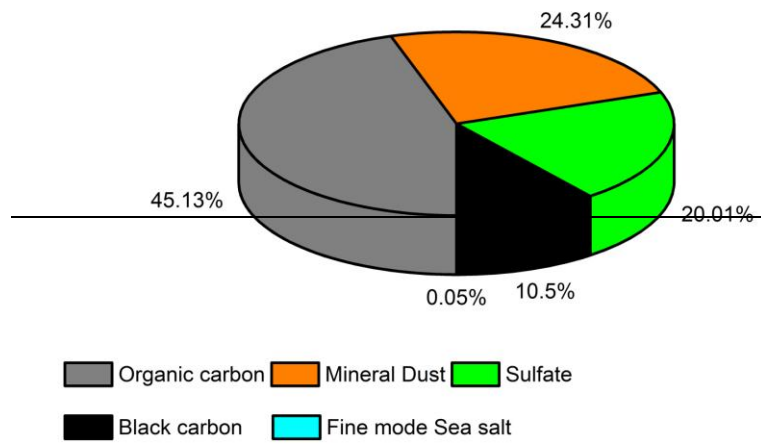

**Figure 13.** WRF-STEM model-estimated PM<sub>2.5</sub> chemical composition at Lumbini for pre-monsoon season 2013

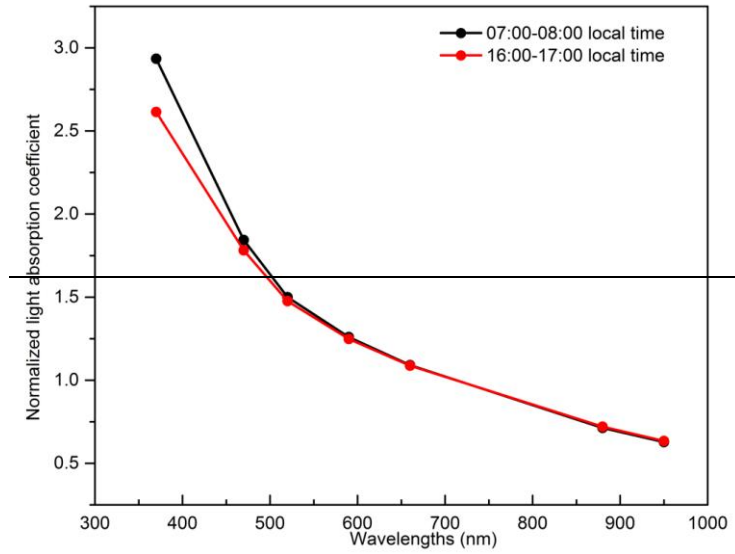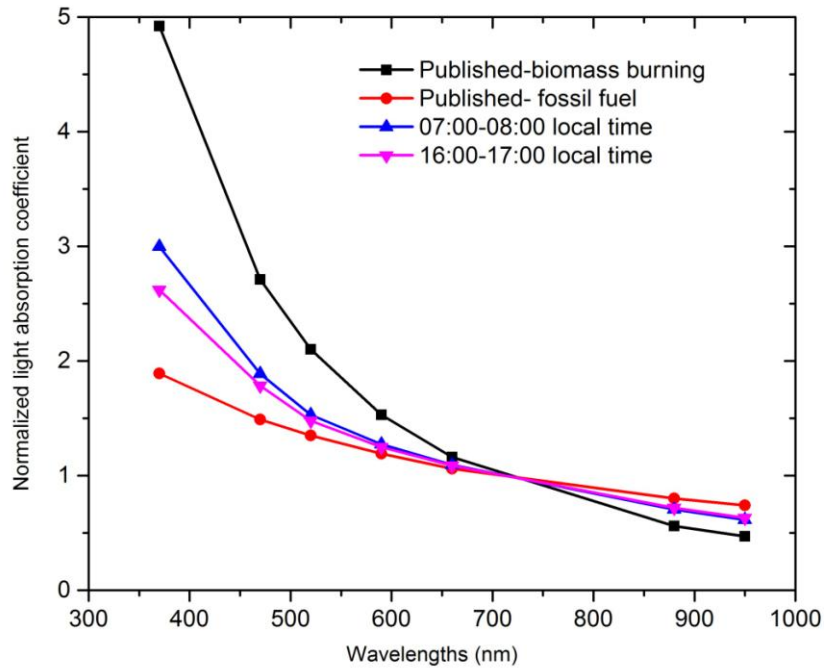

**Figure 14.** Comparison of normalized spectral light absorption coefficients obtained during the prime cooking (07:00-08:00 local time) and non cooking time (16:00-17:00 LT) at Lumbini with published data from Kirchstetter et al. (2004).

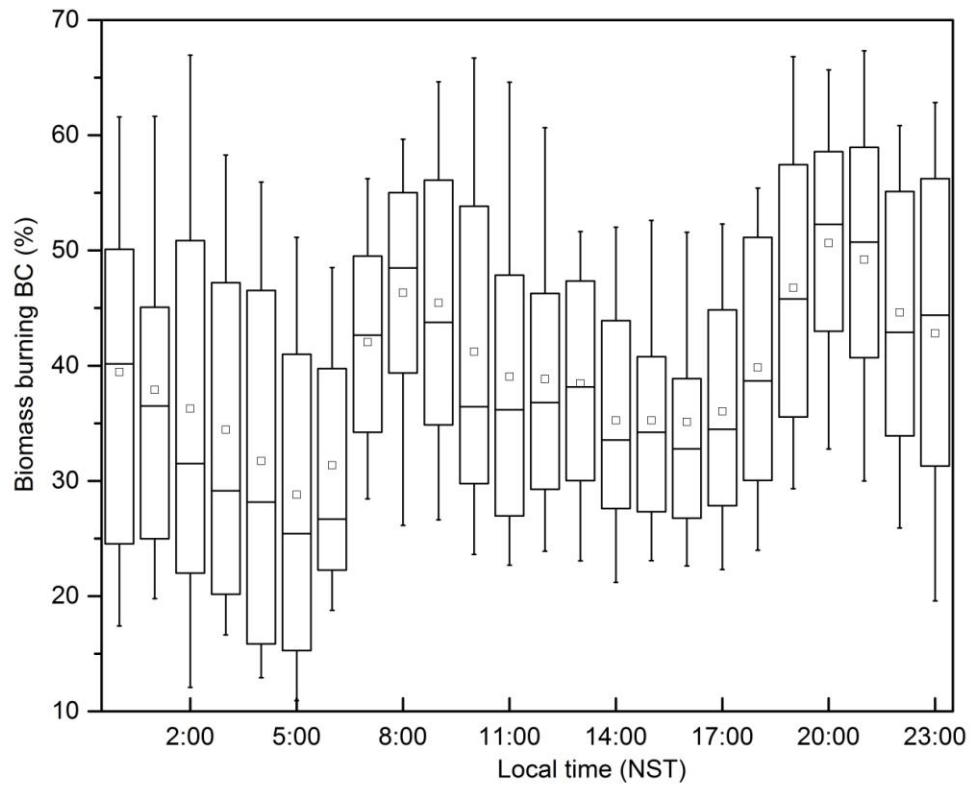

**Figure 15.** Diurnal variation of the fractional contribution of biomass burning to ambient BC concentration at Lumbini for the measurement period. In each box, lower and upper boundary of the box represent 25<sup>th</sup> and 75<sup>th</sup> percentile, respectively, top and bottom of the whisker represents 90<sup>th</sup> and 10<sup>th</sup> percentile, respectively. The mid-line in each box represents median while the square mark represents the mean for each hour.
